# Supplementary material
Source: publisher site journal article supplement (https://www.spandidos-publications.com/3382/downloadSupplementary)
Supplement: Supplementary file 1 [file downloadSupplementary]

## Sheet: 工作表1
Table SVII. DMRs in isolated cardiac defects
ID	logFC	P.Value	Annotation	region	gene	promoter_gene
chr1:36391949-36394999	-3.02862	2.73419e-06	promoter region:MAP7D1|NM_018067(+)	promoter region	MAP7D1	MAP7D1
chr9:96395286-96398336	-2.91558	3.25933e-06	promoter region:FBP2|NM_003837(-)	promoter region	FBP2	FBP2
chr16:1140801-1144625	-2.87375	5.22903e-06	promoter region:CACNA1H|NM_021098(+)//CACNA1H|NM_001005407(+)	promoter region	CACNA1H	CACNA1H
chr17:77799747-77800447	-2.82	7.19955e-06	within:CSNK1D|NM_139062(-)//CSNK1D|NM_001893(-)	within	CSNK1D
chr8:4967689-4968390	-2.817	7.83502e-06	left:CSMD1|NM_033225(127953-)	left	CSMD1
chr7:101987998-101988699	-2.853	1.21416e-05	within:POLR2J3|NM_001097615(-)//SPDYE2|NM_001031618(+)	within	POLR2J3
chr18:32579381-32580081	-2.8172	1.32352e-05	within:FHOD3|NM_025135(+)	within	FHOD3
chr7:76093946-76096996	-2.92604	1.4174e-05	promoter region:POMZP3|NM_152992(-)//POMZP3|NM_012230(-)	promoter region	POMZP3	POMZP3
chr19:44586886-44590782	-2.82625	1.51754e-05	promoter region:ZFP36|NM_003407(+)	promoter region	ZFP36	ZFP36
chr12:120780542-120783592	-2.86708	1.55702e-05	promoter region:HPD|NM_002150(-)	promoter region	HPD	HPD
chr19:3604105-3604806	-2.77125	1.6719e-05	within:PIP5K1C|NM_012398(-)	within	PIP5K1C
chr8:142699129-142699830	-2.755	1.79212e-05	left:FLJ43860|NM_207414(112617-)	left	FLJ43860
chr12:1618820-1619520	-2.76821	1.82922e-05	within:WNT5B|NM_030775(+)//WNT5B|NM_032642(+)	within	WNT5B
chr19:12705919-12709915	-2.81875	2.02277e-05	promoter region:ASNA1|NM_004317(+)//C19orf43|NM_024038(-)	promoter region	ASNA1	ASNA1
chrX:122693880-122697025	-2.85178	2.04531e-05	promoter region:THOC2|NM_001081550(-)//THOC2|NM_020449(-)	promoter region	THOC2	THOC2
chr20:18071302-18074352	-2.73899	2.07272e-05	promoter region:CSRP2BP|NM_177926(+)	promoter region	CSRP2BP	CSRP2BP
chr17:71425436-71426136	-2.84917	2.39872e-05	within:FBF1|NM_001080542(-)	within	FBF1
chr18:74653532-74654233	-2.86792	2.43686e-05	left:GALR1|NM_001480(1562537+)	left	GALR1
chr11:129442485-129446008	-2.75375	2.44139e-05	promoter region:APLP2|NM_001142276(+)//APLP2|NM_001642(+)//APLP2|NM_001142278(+)//APLP2|NR_024515(+)//APLP2|NM_001142277(+)//APLP2|NR_024516(+)	promoter region	APLP2	APLP2
chrX:47814842-47817892	-2.73938	2.45841e-05	promoter region:ZNF630|NM_001037735(-)	promoter region	ZNF630	ZNF630
chr15:82973254-82976304	-2.80517	2.50526e-05	promoter region:SCAND2|NR_004859(+)//SCAND2|NR_003654(+)	promoter region	SCAND2	SCAND2
chr16:1354285-1354985	-2.838	2.54147e-05	within:UNKL|NM_023076(-)	within	UNKL
chr6:41619701-41624167	-2.70917	2.60827e-05	promoter region:FOXP4|NM_138457(+)//FOXP4|NM_001012427(+)//FOXP4|NM_001012426(+)	promoter region	FOXP4	FOXP4
chr17:8006408-8009458	-2.98862	2.61217e-05	promoter region:VAMP2|NM_014232(-)	promoter region	VAMP2	VAMP2
chr3:184692146-184692846	-2.70524	2.66788e-05	within:KLHL6|NM_130446(-)	within	KLHL6
chr20:55118611-55119311	-2.70515	2.76907e-05	left:TFAP2C|NM_003222(480847+)	left	TFAP2C
chr20:31695597-31696298	-2.72094	2.88063e-05	within:CBFA2T2|NM_001039709(+)//CBFA2T2|NM_005093(+)//CBFA2T2|NM_001032999(+)	within	CBFA2T2
chr11:67521313-67522013	-2.79786	3.00517e-05	within:UNC93B1|NM_030930(-)	within	UNC93B1
chrX:70901499-70902199	-2.72345	3.08108e-05	within:CXorf49|NM_001145140(+)//CXorf49B|NM_001145139(+)	within	CXorf49
chr8:142364380-142365081	-2.72744	3.14795e-05	left:SLC45A4|NM_001080431(56525-)	left	SLC45A4
chrX:48653251-48656619	-2.84885	3.23747e-05	promoter region:SLC35A2|NM_001032289(-)//SLC35A2|NM_005660(-)//SLC35A2|NM_001042498(-)	promoter region	SLC35A2	SLC35A2
chr20:60873545-60874245	-2.74275	3.244e-05	left:NTSR1|NM_002531(62912+)	left	NTSR1
chr6:37733864-37734564	-2.68767	3.33648e-05	within:MDGA1|NM_153487(-)	within	MDGA1
chr13:18653326-18656376	-2.81449	3.33926e-05	promoter region:TUBA3C|NM_006001(-)	promoter region	TUBA3C	TUBA3C
chr16:844193-844894	-2.68613	3.38209e-05	within:LMF1|NM_022773(-)	within	LMF1
chr4:132873600-132874300	-2.70092	3.46259e-05	left:C4orf33|NM_001099783(2636869+)	left	C4orf33
chr2:242167721-242168422	-2.93187	3.50598e-05	left:BOK|NM_032515(20857+)	left	BOK
chrX:139909981-139913031	-2.69875	3.58157e-05	promoter region:SPANXB1|NM_032461(+)//SPANXF1|NM_139019(+)//SPANXB2|NM_145664(+)	promoter region	SPANXB1	SPANXB1
chr4:132866139-132866839	-2.68375	3.60085e-05	left:C4orf33|NM_001099783(2629408+)	left	C4orf33
chr6:29875807-29876508	-2.7933	3.68801e-05	left:HCG4|NR_002139(6978-)	left	HCG4
chr10:3490104-3490804	-2.68714	3.72425e-05	left:PITRM1|NM_014889(285101-)	left	PITRM1
chr22:47108539-47109239	-2.75536	3.83922e-05	left:TBC1D22A|NM_014346(1571327+)	left	TBC1D22A
chrX:55041064-55044114	-2.91655	3.99874e-05	promoter region:APEX2|NM_014481(+)	promoter region	APEX2	APEX2
chr12:131873016-131873717	-2.66375	4.02233e-05	within:GOLGA3|NM_005895(-)	within	GOLGA3
chr19:44956633-44959683	-2.68792	4.0826e-05	promoter region:LEUTX|NM_001143832(+)	promoter region	LEUTX	LEUTX
chr7:148802273-148802974	-2.67039	4.0845e-05	within:ZNF746|NM_152557(-)	within	ZNF746
chr3:47862641-47863342	-2.6871	4.18415e-05	within:DHX30|NM_138615(+)//DHX30|NM_014966(+)	within	DHX30
chr7:151789701-151793046	-2.76162	4.18541e-05	promoter region:LOC100128822|NR_027387(+)	promoter region	LOC100128822	LOC100128822
chr16:2612575-2613276	-2.751	4.28074e-05	within:LOC652276|NR_015441(+)	within	LOC652276
chr22:41834260-41837554	-2.67	4.29947e-05	promoter region:BIK|NM_001197(+)	promoter region	BIK	BIK
chr19:56824929-56827979	-2.75333	4.35087e-05	promoter region:SIGLEC5|NM_003830(-)	promoter region	SIGLEC5	SIGLEC5
chr1:33419200-33422698	-2.80524	4.45116e-05	promoter region:TRIM62|NM_018207(-)	promoter region	TRIM62	TRIM62
chr1:141560167-141560868	-2.68982	4.45864e-05	left:EMBP1|NR_003955(20597735+)	left	EMBP1
chr7:157216918-157219502	-2.66948	4.48488e-05	within:PTPRN2|NM_130842(-)//PTPRN2|NM_130843(-)//PTPRN2|NM_002847(-)	within	PTPRN2
chr1:153010999-153011699	-2.72107	4.52198e-05	within:KCNN3|NM_170782(-)//KCNN3|NM_002249(-)	within	KCNN3
chr17:4619495-4622545	-2.74126	4.53673e-05	promoter region:TM4SF5|NM_003963(+)	promoter region	TM4SF5	TM4SF5
chr11:131065317-131066018	-2.68851	4.59099e-05	within:NTM|NM_001048209(+)	within	NTM
chr7:2055913-2056613	-2.70143	4.5917e-05	within:MAD1L1|NM_003550(-)//MAD1L1|NM_001013837(-)//MAD1L1|NM_001013836(-)	within	MAD1L1
chr19:53707648-53710698	-2.74262	4.61442e-05	promoter region:LMTK3|NM_001080434(-)	promoter region	LMTK3	LMTK3
chr17:53710003-53710704	-2.69966	4.62822e-05	within:MPO|NM_000250(-)	within	MPO
chr14:75975283-75975983	-2.65593	4.71922e-05	within:ESRRB|NM_004452(+)	within	ESRRB
chr7:98759005-98762055	-2.75167	4.8801e-05	promoter region:ARPC1A|NM_006409(+)	promoter region	ARPC1A	ARPC1A
chr14:105234644-105235345	-2.64754	4.91258e-05	left:TMEM121|NM_025268(170647+)	left	TMEM121
chr6:44361651-44362352	-2.64969	4.97725e-05	within:TCTE1|NM_182539(-)	within	TCTE1
chr20:39679759-39682987	-2.71833	5.06716e-05	promoter region:CHD6|NM_032221(-)	promoter region	CHD6	CHD6
chr9:70871582-70872282	-2.65696	5.06943e-05	within:FXN|NM_181425(+)//FXN|NM_000144(+)	within	FXN
chr6:90652934-90653635	-2.69906	5.10359e-05	left:CASP8AP2|NM_012115//CASP8AP2|NM_001137667//CASP8AP2|NM_001137668(56595+)	left	CASP8AP2
chr3:75916335-75919385	-2.69396	5.10734e-05	promoter region:ZNF717|NM_001128223(-)	promoter region	ZNF717	ZNF717
chr16:87879827-87880528	-2.69365	5.11678e-05	within:ANKRD11|NM_013275(-)	within	ANKRD11
chrX:101283434-101286484	-2.68775	5.14166e-05	promoter region:TCEAL6|NM_001006938(-)	promoter region	TCEAL6	TCEAL6
chr20:59987862-59988987	-2.68759	5.26351e-05	within:TAF4|NM_003185(-)	within	TAF4
chr22:47524042-47524743	-2.64533	5.32114e-05	within:FAM19A5|NM_015381(+)//FAM19A5|NM_001082967(+)	within	FAM19A5
chrY:786383-787083	-2.69563	5.40705e-05	left:SHOX|NM_006883//SHOX|NM_000451(281305+)	left	SHOX
chr5:1904103-1904803	-2.64917	5.49682e-05	left:NDUFS6|NM_004553(49595+)	left	NDUFS6
chr2:178645118-178648168	-2.64009	5.49717e-05	promoter region:PDE11A|NM_016953(-)	promoter region	PDE11A	PDE11A
chr19:7717854-7720904	-2.67558	5.55934e-05	promoter region:CD209|NR_026692(-)//CD209|NM_001144893(-)//CD209|NM_001144895(-)//CD209|NM_021155(-)//CD209|NM_001144896(-)//CD209|NM_001144899(-)//CD209|NM_001144894(-)//CD209|NM_001144897(-)	promoter region	CD209	CD209
chr15:28441681-28442381	-2.76696	5.61136e-05	within:CHRFAM7A|NM_148911(-)//CHRFAM7A|NM_139320(-)	within	CHRFAM7A
chr2:121699653-121700353	-2.71685	5.66996e-05	within:TFCP2L1|NM_014553(-)	within	TFCP2L1
chr6:169804442-169805142	-2.66226	5.80451e-05	within:WDR27|NM_182552(-)	within	WDR27
chr17_random:356751-359801	-2.64472	5.81111e-05	promoter region:KRTAP3-3|NM_033185(+)	promoter region	KRTAP3-3	KRTAP3-3
chr19:3676933-3679983	-2.65	5.85319e-05	promoter region:TJP3|NM_014428(+)	promoter region	TJP3	TJP3
chr7:55379459-55380266	-2.62237	5.87185e-05	left:EGFR|NM_201283//EGFR|NM_201282//EGFR|NM_201284//EGFR|NM_005228(325241+)	left	EGFR
chr7:56917237-56917937	-2.67193	5.91084e-05	left:|NR_027050(69314-)	left
chr4:8639383-8640083	-2.64817	6.00227e-05	within:GPR78|NM_080819(+)	within	GPR78
chr19:45578401-45579101	-2.63886	6.00546e-05	within:HIPK4|NM_144685(-)	within	HIPK4
chr21:45624335-45625274	-2.64386	6.06312e-05	left:LOC642852|NR_026943(91941+)	left	LOC642852
chr12:131352384-131353084	-2.65208	6.07247e-05	within:GALNT9|NM_001122636(-)	within	GALNT9
chr22:41372329-41377789	-2.6551	6.18261e-05	promoter region:CYB5R3|NM_001129819(-)//CYB5R3|NM_007326(-)//CYB5R3|NM_000398(-)	promoter region	CYB5R3	CYB5R3
chr20:59903252-59903953	-2.80812	6.22242e-05	within:CDH4|NM_001794(+)	within	CDH4
chr22:40854675-40855852	-2.6431	6.24611e-05	within:CYP2D6|NM_000106(-)//CYP2D6|NM_001025161(-)	within	CYP2D6
chr7:155590674-155591374	-2.68714	6.29741e-05	left:SHH|NM_000193(292946-)	left	SHH
chr16:4251469-4252170	-2.6475	6.30254e-05	within:TFAP4|NM_003223(-)	within	TFAP4
chrX:2835192-2835892	-2.64629	6.34933e-05	within:ARSD|NM_001669(-)	within	ARSD
chr19:2168569-2169269	-2.68714	6.42587e-05	within:DOT1L|NM_032482(+)	within	DOT1L
chr13:112735275-112735976	-2.65823	6.5267e-05	within:MCF2L|NM_001112732(+)//MCF2L|NM_024979(+)	within	MCF2L
chr7:149040640-149043690	-2.6232	6.60715e-05	promoter region:KRBA1|NM_032534(+)	promoter region	KRBA1	KRBA1
chrX:54400553-54403603	-2.62932	6.84641e-05	promoter region:WNK3|NM_001002838(-)//WNK3|NM_020922(-)	promoter region	WNK3	WNK3
chr19:11076755-11077456	-2.61792	6.94077e-05	within:LDLR|NM_000527(+)	within	LDLR
chr18:75307871-75308572	-2.71256	7.03822e-05	within:NFATC1|NM_172390(+)//NFATC1|NM_172388(+)//NFATC1|NM_006162(+)//NFATC1|NM_172387(+)//NFATC1|NM_172389(+)	within	NFATC1
chr22:16007231-16008723	-2.60994	7.1135e-05	within:CECR5|NM_017829(-)//CECR5|NM_033070(-)	within	CECR5
chrX:118167960-118171010	-2.65025	7.14742e-05	promoter region:KIAA1210|NM_020721(-)	promoter region	KIAA1210	KIAA1210
chr3:52453473-52456523	-2.64062	7.19996e-05	promoter region:SEMA3G|NM_020163(-)	promoter region	SEMA3G	SEMA3G
chr1:70155152-70158202	-2.63683	7.30795e-05	promoter region:PIN1L|NR_023916(+)	promoter region	PIN1L	PIN1L
chr10:135082661-135083361	-2.60864	7.36229e-05	within:MTG1|NM_138384(+)	within	MTG1
chr10:65403077-65403778	-2.60634	7.51043e-05	left:REEP3|NM_001001330(451949+)	left	REEP3
chr17:928028-928728	-2.63429	7.62028e-05	within:ABR|NM_001092(-)//ABR|NM_021962(-)//ABR|NM_001159746(-)	within	ABR
chr10:104208719-104211769	-2.65479	7.67508e-05	promoter region:TMEM180|NM_024789(+)	promoter region	TMEM180	TMEM180
chr17:36996063-36999113	-2.61114	7.70822e-05	promoter region:KRT14|NM_000526(-)	promoter region	KRT14	KRT14
chr11:117359875-117362925	-2.66483	7.70889e-05	promoter region:IL10RA|NR_026691(+)//IL10RA|NM_001558(+)	promoter region	IL10RA	IL10RA
chr19:4273737-4274438	-2.60867	7.72314e-05	within:FSD1|NM_024333(+)	within	FSD1
chr19:21915259-21915959	-2.61386	7.74606e-05	left:ZNF43|NM_003423(104449-)	left	ZNF43
chrX:54961533-54964583	-2.71996	7.77885e-05	promoter region:TRO|NM_016157(+)//TRO|NM_001039705(+)//TRO|NM_177556(+)	promoter region	TRO	TRO
chr16:1082316-1084088	-2.6231	7.78459e-05	within:C1QTNF8|NM_207419(-)	within	C1QTNF8
chr20:61979360-61980060	-2.62986	7.79396e-05	within:TPD52L2|NM_199363(+)//TPD52L2|NM_199362(+)//TPD52L2|NM_199361(+)//TPD52L2|NM_199360(+)//TPD52L2|NM_199359(+)//TPD52L2|NM_003288(+)	within	TPD52L2
chr16:2143359-2147547	-2.60747	7.81706e-05	promoter region:TRAF7|NM_032271(+)//SNORD60|NR_002736(-)	promoter region	TRAF7	TRAF7
chr17:59341740-59344790	-2.61414	8.02583e-05	promoter region:CSHL1|NM_022581(-)//CSHL1|NM_022580(-)//CSHL1|NM_001318(-)//CSHL1|NM_022579(-)	promoter region	CSHL1	CSHL1
chr2:25207684-25208384	-2.6275	8.25012e-05	within:EFR3B|NM_014971(+)	within	EFR3B
chr3:49915700-49918750	-2.59687	8.251e-05	promoter region:MST1R|NM_002447(-)	promoter region	MST1R	MST1R
chr17_random:1443682-1444382	-2.65289	8.32955e-05	left:TBC1D3B|NM_001001417(150894+)	left	TBC1D3B
chr2:96536963-96540013	-2.71781	8.46968e-05	promoter region:NEURL3|NR_026875(-)	promoter region	NEURL3	NEURL3
chr15:19336057-19339107	-2.5919	8.49826e-05	promoter region:POTEB|NM_207355(-)	promoter region	POTEB	POTEB
chr2:234207421-234210471	-2.6824	8.66531e-05	promoter region:UGT1A10|NM_019075(+)	promoter region	UGT1A10	UGT1A10
chr8:37724069-37727119	-2.69858	8.75648e-05	promoter region:LOC728024|NR_003671(-)	promoter region	LOC728024	LOC728024
chr7:2438771-2440093	-2.63818	8.81546e-05	within:CHST12|NM_018641(+)	within	CHST12
chr17:659688-660388	-2.69346	8.83254e-05	within:NXN|NM_022463(-)	within	NXN
chr8:6411609-6412310	-2.63719	8.83419e-05	within:MCPH1|NM_024596(+)	within	MCPH1
chr5:1113346-1114731	-2.65923	8.95827e-05	within:SLC12A7|NM_006598(-)	within	SLC12A7
chr14:102919013-102922461	-2.63008	9.00699e-05	promoter region:MARK3|NM_001128921(+)//MARK3|NM_002376(+)//MARK3|NM_001128918(+)//MARK3|NM_001128919(+)//MARK3|NM_001128920(+)	promoter region	MARK3	MARK3
chr4_random:498283-498983	-2.648	9.13443e-05	within:LOC100132288|NM_001033515(-)	within	LOC100132288
chr8:37771141-37775258	-2.59098	9.204e-05	promoter region:GPR124|NM_032777(+)	promoter region	GPR124	GPR124
chr17:3045122-3048172	-2.58433	9.26684e-05	promoter region:OR1A2|NM_012352(+)	promoter region	OR1A2	OR1A2
chrX:75562080-75565937	-2.6153	9.30768e-05	promoter region:MAGEE1|NM_020932(+)	promoter region	MAGEE1	MAGEE1
chrX:250133-252418	-2.58651	9.38965e-05	within:PPP2R3B|NM_013239(-)	within	PPP2R3B
chr2:10583754-10584454	-2.66875	9.41098e-05	left:ODC1|NM_002539(77850-)	left	ODC1
chr2:96890973-96891674	-2.61616	9.57418e-05	within:SEMA4C|NM_017789(-)	within	SEMA4C
chr15:72489857-72490557	-2.5885	9.6371e-05	within:SEMA7A|NM_001146030(-)//SEMA7A|NM_001146029(-)//SEMA7A|NM_003612(-)	within	SEMA7A
chr17:33887176-33887876	-2.65464	0.000100345	within:ARHGAP23|NM_020876(+)	within	ARHGAP23
chr13:112713989-112715332	-2.57917	0.000100537	within:MCF2L|NM_001112732(+)//MCF2L|NM_024979(+)	within	MCF2L
chr2:1648754-1649454	-2.6645	0.00010077	within:PXDN|NM_012293(-)	within	PXDN
chr2:232163415-232166465	-2.59621	0.000100777	promoter region:C2orf57|NM_152614(+)	promoter region	C2orf57	C2orf57
chrX:19727228-19730278	-2.72021	0.000101108	promoter region:SH3KBP1|NM_001024666(-)	promoter region	SH3KBP1	SH3KBP1
chr10:99467282-99470332	-2.62626	0.000101177	promoter region:LOC100270710|NR_026754(-)	promoter region	LOC100270710	LOC100270710
chr8:11508190-11508891	-2.62812	0.000101698	left:BLK|NM_001715(119261+)	left	BLK
chr10:134693260-134693961	-2.64363	0.000102159	left:C10orf93|NM_173572(87206-)	left	C10orf93
chr19:3610445-3611145	-2.58354	0.000102173	within:PIP5K1C|NM_012398(-)	within	PIP5K1C
chr16:87983609-87984310	-2.57812	0.000102228	within:ANKRD11|NM_013275(-)	within	ANKRD11
chr16:3109354-3110229	-2.57417	0.00010274	within:ZNF205|NM_001042428(+)//ZNF205|NM_003456(+)	within	ZNF205
chr11:44949588-44952638	-2.61289	0.000103249	promoter region:LOC221122|NR_026681(+)	promoter region	LOC221122	LOC221122
chr15:20533392-20534092	-2.69815	0.000103507	within:CYFIP1|NM_014608(+)//CYFIP1|NM_001033028(+)	within	CYFIP1
chr11:17757377-17758078	-2.62469	0.000103729	within:KCNC1|NM_001112741(+)	within	KCNC1
chr21:42103306-42104006	-2.58793	0.000104693	within:PRDM15|NM_022115(-)//PRDM15|NM_001040424(-)	within	PRDM15
chr2:132147609-132148309	-2.57795	0.00010706	left:CCDC74A|NM_138770(145648+)	left	CCDC74A
chr15:72882157-72882858	-2.59607	0.000107378	left:CSK|NM_001127190//CSK|NM_004383(20680+)	left	CSK
chr5:167621710-167622411	-2.58562	0.00010864	within:ODZ2|NM_001122679(+)	within	ODZ2
chr14:92175765-92176465	-2.6025	0.000108773	within:RIN3|NM_024832(+)	within	RIN3
chr1:40892231-40892931	-2.64354	0.000109396	within:RIMS3|NM_014747(-)	within	RIMS3
chr19:63714634-63717684	-2.58592	0.000110044	promoter region:SLC27A5|NM_012254(-)	promoter region	SLC27A5	SLC27A5
chr8:965032-965758	-2.66275	0.000110344	left:ERICH1|NM_207332(293806-)	left	ERICH1
chr17_random:114182-117232	-2.57625	0.000111701	promoter region:MGC70870|NR_003682(+)	promoter region	MGC70870	MGC70870
chr3:197119667-197122717	-2.59076	0.000115678	promoter region:TNK2|NM_005781(-)	promoter region	TNK2	TNK2
chr5:140188937-140190141	-2.56494	0.000115907	within:PCDHA6|NM_018909(+)//PCDHA6|NM_031849(+)//PCDHA6|NM_031848(+)//PCDHA5|NM_018908(+)//PCDHA4|NM_018907(+)//PCDHA3|NM_018906(+)//PCDHA2|NM_018905(+)//PCDHA1|NM_031411(+)//PCDHA1|NM_018900(+)	within	PCDHA6
chr9:35607814-35610864	-2.63374	0.000116677	promoter region:CD72|NM_001782(-)	promoter region	CD72	CD72
chr9:139480815-139481515	-2.58929	0.000117982	within:PNPLA7|NM_152286(-)//PNPLA7|NM_001098537(-)	within	PNPLA7
chr15:28649609-28652878	-2.58603	0.000118004	promoter region:FAM7A1|NR_026858(+)//FAM7A2|NR_027470(+)	promoter region	FAM7A1	FAM7A1
chr11:61002727-61005777	-2.576	0.000118643	promoter region:C11orf66|NM_145017(+)	promoter region	C11orf66	C11orf66
chr1:109625592-109626293	-2.5649	0.000120042	within:PSRC1|NM_032636(-)//PSRC1|NM_001032291(-)//PSRC1|NM_001032290(-)//PSRC1|NM_001005290(-)	within	PSRC1
chrX:1521933-1522774	-2.58278	0.000120224	within:ASMTL|NM_004192(-)	within	ASMTL
chr8:54669435-54670136	-2.55804	0.000121539	left:OPRK1|NM_000912(342688-)	left	OPRK1
chr2:242254642-242255342	-2.58857	0.000121985	within:ATG4B|NM_013325(+)//ATG4B|NM_178326(+)	within	ATG4B
chrY:250133-252418	-2.58941	0.000122873	within:PPP2R3B|NM_013239(-)	within	PPP2R3B
chr9:133172942-133173643	-2.55961	0.000123362	within:PPAPDC3|NM_032728(+)	within	PPAPDC3
chr17:36928186-36931236	-2.57833	0.000124261	promoter region:KRT15|NM_002275(-)	promoter region	KRT15	KRT15
chr19:1386922-1389972	-2.58839	0.000124557	promoter region:RPS15|NM_001018(+)	promoter region	RPS15	RPS15
chr22:48563624-48564325	-2.60125	0.000124716	within:BRD1|NM_014577(-)	within	BRD1
chr19:38570373-38571074	-2.5676	0.000125392	within:PEPD|NM_000285(-)	within	PEPD
chr2:132131707-132132407	-2.59964	0.000125516	left:CCDC74A|NM_138770(129746+)	left	CCDC74A
chr19:1349926-1350627	-2.55719	0.000128381	within:GAMT|NM_000156(-)//GAMT|NM_138924(-)	within	GAMT
chr19:59354648-59358311	-2.56693	0.000129336	promoter region:LENG1|NM_024316(-)	promoter region	LENG1	LENG1
chr6:41114296-41118880	-2.58501	0.000130002	promoter region:UNC5CL|NM_173561(-)//TSPO2|NM_001010873(+)	promoter region	UNC5CL	UNC5CL
chr17:24062211-24065439	-2.60125	0.000130608	promoter region:PROCA1|NM_152465(-)	promoter region	PROCA1	PROCA1
chr19:5084700-5085400	-2.56221	0.00013142	within:KDM4B|NM_015015(+)	within	KDM4B
chr17_random:1427270-1427971	-2.55615	0.000132194	left:TBC1D3B|NM_001001417(134482+)	left	TBC1D3B
chr10:129085071-129085771	-2.56179	0.000133195	within:DOCK1|NM_001380(+)	within	DOCK1
chr18:75006885-75007585	-2.58775	0.000133258	within:ATP9B|NM_198531(+)	within	ATP9B
chr16:87314824-87315524	-2.59654	0.000133766	within:FAM38A|NM_001142864(-)	within	FAM38A
chr11:1983100-1983801	-2.54864	0.000134263	left:H19|NR_002196(7459-)	left	H19
chr12:51886657-51889707	-2.5797	0.000134805	promoter region:ITGB7|NM_000889(-)	promoter region	ITGB7	ITGB7
chr22:41899785-41900486	-2.57727	0.000134942	within:TTLL12|NM_015140(-)	within	TTLL12
chr9:138339312-138344040	-2.55731	0.00013626	promoter region:GPSM1|NM_015597(+)//LOC26102|NR_026964(-)//GPSM1|NM_001145638(+)	promoter region	GPSM1	GPSM1
chr15:70276502-70279630	-2.5931	0.00013638	promoter region:GRAMD2|NM_001012642(-)	promoter region	GRAMD2	GRAMD2
chr19:63583591-63586641	-2.5508	0.000138268	promoter region:ZNF837|NM_138466(-)//ZNF837|NM_001129730(-)	promoter region	ZNF837	ZNF837
chr8:143876352-143877052	-2.55725	0.000138376	left:LY6D|NM_003695(11342-)	left	LY6D
chr1:16217262-16221682	-2.55667	0.000138519	promoter region:CLCNKA|NM_001042704(+)//CLCNKA|NM_004070(+)//HSPB7|NM_014424(-)	promoter region	CLCNKA	CLCNKA
chr16:2068490-2069765	-2.55737	0.000138544	within:TSC2|NM_000548(+)//TSC2|NM_001077183(+)//TSC2|NM_001114382(+)	within	TSC2
chr7:43930131-43934961	-2.66337	0.000138656	promoter region:UBE2D4|NM_015983(+)//URGCP|NM_001077664(-)	promoter region	UBE2D4	UBE2D4
chr13:113190868-113195464	-2.62201	0.000140374	promoter region:TMCO3|NM_017905(+)//DCUN1D2|NM_001014283(-)	promoter region	TMCO3	TMCO3
chr9:123561867-123562567	-2.56071	0.000142215	within:DAB2IP|NM_138709(+)//DAB2IP|NM_032552(+)	within	DAB2IP
chr19:7870221-7870922	-2.60354	0.000142271	within:LRRC8E|NM_025061(+)	within	LRRC8E
chrX:114327778-114333451	-2.68287	0.00014353	promoter region:RBMXL3|NM_001145346(+)	promoter region	RBMXL3	RBMXL3
chrX:102417846-102420896	-2.54853	0.000144932	promoter region:TCEAL5|NM_001012979(-)	promoter region	TCEAL5	TCEAL5
chr1:149636224-149639274	-2.56225	0.000145369	promoter region:PSMB4|NM_002796(+)	promoter region	PSMB4	PSMB4
chr12:34394401-34395101	-2.62705	0.000148297	left:ALG10|NM_032834(327919+)	left	ALG10
chr22:45213448-45214149	-2.54083	0.000148465	within:CELSR1|NM_014246(-)	within	CELSR1
chr17:23961980-23967778	-2.62917	0.000148825	promoter region:SGK494|NR_024395(-)//SGK494|NM_144610(-)	promoter region	SGK494	SGK494
chr19:14537021-14537722	-2.57871	0.000151534	within:TECR|NM_138501(+)	within	TECR
chr9:99498902-99501952	-2.54536	0.000152523	promoter region:XPA|NR_027302(-)//XPA|NM_000380(-)	promoter region	XPA	XPA
chr4:6430940-6431640	-2.63407	0.000152903	within:PPP2R2C|NM_020416(-)//PPP2R2C|NM_181876(-)	within	PPP2R2C
chr17:8588269-8591319	-2.56625	0.000154573	promoter region:CCDC42|NM_001158261(-)//CCDC42|NM_144681(-)	promoter region	CCDC42	CCDC42
chr9:139117418-139118118	-2.53688	0.000155242	within:MAN1B1|NM_016219(+)	within	MAN1B1
chr17:39093847-39097228	-2.56161	0.000155257	promoter region:MEOX1|NM_013999(-)//MEOX1|NM_004527(-)//MEOX1|NM_001040002(-)	promoter region	MEOX1	MEOX1
chrX:52966632-52967358	-2.63621	0.000155615	left:FAM156B|NM_001099684(21499+)	left	FAM156B
chr17:44400344-44403394	-2.66038	0.000155803	promoter region:GIP|NM_004123(-)	promoter region	GIP	GIP
chr1:199462421-199463122	-2.60477	0.000157309	within:IGFN1|NM_178275(+)	within	IGFN1
chr17:76778983-76779779	-2.55938	0.000158526	within:AZI1|NM_001009811(-)//AZI1|NM_014984(-)	within	AZI1
chr11:62097426-62100476	-2.56082	0.000160313	promoter region:EEF1G|NM_001404(-)	promoter region	EEF1G	EEF1G
chr19:1255564-1256264	-2.54721	0.000161353	left:EFNA2|NM_001405(18397+)	left	EFNA2
chr11:1447587-1448287	-2.54114	0.000161375	within:MOB2|NM_053005(-)	within	MOB2
chr7:35973536-35974679	-2.53638	0.000162612	left:SEPT7|NM_001011553//SEPT7|NM_001788(166385+)	left	SEPT7
chr12:111106531-111107232	-2.53094	0.000164152	within:C12orf51|NM_001109662(-)	within	C12orf51
chr11:474870-475620	-2.55469	0.00016601	within:PTDSS2|NM_030783(+)	within	PTDSS2
chr16:65509657-65512707	-2.54454	0.000166096	promoter region:CDH16|NM_004062(-)	promoter region	CDH16	CDH16
chr11_random:1518-2219	-2.61313	0.000168669	left:	left	left:
chr9:34369429-34374038	-2.58292	0.000171168	promoter region:C9orf24|NM_147168(-)//C9orf24|NM_147169(-)	promoter region	C9orf24	C9orf24
chr1:25101051-25101751	-2.52792	0.000171502	within:RUNX3|NM_004350(-)//RUNX3|NM_001031680(-)	within	RUNX3
chr3:49434406-49437456	-2.59702	0.000172037	promoter region:AMT|NM_000481(-)	promoter region	AMT	AMT
chr10:50009690-50010390	-2.53017	0.000173988	left:C10orf72|NM_001031746//C10orf72|NM_144984(16125-)	left	C10orf72
chr5:139040578-139041279	-2.53089	0.000174481	within:CXXC5|NM_016463(+)	within	CXXC5
chr1:1454170-1454870	-2.58027	0.000174508	within:ATAD3A|NM_018188(+)	within	ATAD3A
chr15:62781905-62784955	-2.77067	0.000175339	promoter region:OAZ2|NM_002537(-)	promoter region	OAZ2	OAZ2
chr8:143742682-143743383	-2.56458	0.000175925	within:JRK|NM_003724(-)//JRK|NM_001077527(-)	within	JRK
chr20:60322174-60322875	-2.54521	0.000176289	within:LAMA5|NM_005560(-)	within	LAMA5
chr19:40461360-40462060	-2.5525	0.000177627	within:USF2|NM_003367(+)//USF2|NM_207291(+)	within	USF2
chr9:67903252-67903952	-2.58593	0.000177917	left:ANKRD20A1|NM_032250//ANKRD20A3|NM_001012419(386672+)	left	ANKRD20A1
chr19:1773138-1773839	-2.53942	0.000178383	within:REXO1|NM_020695(-)	within	REXO1
chr9:139010235-139013285	-2.55226	0.000178528	promoter region:CLIC3|NM_004669(-)	promoter region	CLIC3	CLIC3
chr20:61387728-61388429	-2.81389	0.000180024	within:ARFGAP1|NM_018209(+)//ARFGAP1|NM_175609(+)	within	ARFGAP1
chr18:42352437-42355487	-2.59372	0.000180189	promoter region:LOXHD1|NM_001145473(-)	promoter region	LOXHD1	LOXHD1
chr4:1211593-1212744	-2.52004	0.000181869	within:CTBP1|NM_001012614(-)//CTBP1|NM_001328(-)	within	CTBP1
chr19:49724778-49727828	-2.52354	0.000182861	promoter region:CEACAM20|NM_001102598(-)//CEACAM20|NM_001102599(-)//CEACAM20|NM_001102600(-)//CEACAM20|NM_001102597(-)	promoter region	CEACAM20	CEACAM20
chr1:2399413-2400113	-2.53036	0.000184347	within:PLCH2|NM_014638(+)	within	PLCH2
chr7:75889767-75892817	-2.53544	0.000184824	promoter region:ZP3|NM_001110354(+)	promoter region	ZP3	ZP3
chr8:135559768-135560468	-2.54893	0.000185434	within:ZFAT|NM_020863(-)	within	ZFAT
chr9:139124741-139125441	-2.53319	0.00018672	left:MAN1B1|NM_016219(23504+)	left	MAN1B1
chr16:88181517-88182218	-2.55625	0.000189976	within:CPNE7|NM_014427(+)//CPNE7|NM_153636(+)	within	CPNE7
chr9:138963963-138967607	-2.55208	0.000190192	promoter region:LCN12|NM_178536(+)	promoter region	LCN12	LCN12
chr10:48008853-48009553	-2.53821	0.000190737	within:RBP3|NM_002900(-)	within	RBP3
chr17:45968821-45969521	-2.65196	0.000190892	within:EPN3|NM_017957(+)	within	EPN3
chr15:99235091-99238656	-2.5493	0.000192144	promoter region:ALDH1A3|NM_000693(+)	promoter region	ALDH1A3	ALDH1A3
chr12:120591333-120594383	-2.62358	0.000192839	promoter region:MORN3|NM_173855(-)	promoter region	MORN3	MORN3
chr12:131079281-131082331	-2.53748	0.000193321	promoter region:SNORA49|NR_002979(+)	promoter region	SNORA49	SNORA49
chr4:8358444-8359144	-2.54157	0.000194193	within:HTRA3|NM_053044(+)	within	HTRA3
chr7:65946638-65949688	-2.55887	0.000194671	promoter region:LOC729156|NR_003934(-)	promoter region	LOC729156	LOC729156
chr8:971094-973679	-2.53646	0.000197783	left:ERICH1|NM_207332(299868-)	left	ERICH1
chr22:17545061-17548741	-2.54033	0.000198078	promoter region:SLC25A1|NM_005984(-)	promoter region	SLC25A1	SLC25A1
chr19:10892714-10893414	-2.53143	0.000200312	within:CARM1|NM_199141(+)	within	CARM1
chr1:16923928-16924628	-2.618	0.000202973	left:ESPNP|NR_026567(4689-)	left	ESPNP
chr19:54556413-54559966	-2.55161	0.000203367	promoter region:DKKL1|NM_014419(+)//TEAD2|NM_003598(-)	promoter region	DKKL1	DKKL1
chrY:24742156-24745206	-2.53488	0.000204411	promoter region:CSPG4P2Y|NR_002194(-)//CSPG4P1Y|NR_001554(-)	promoter region	CSPG4P2Y	CSPG4P2Y
chr7:5966581-5967282	-2.54356	0.000204759	within:RSPH10B2|NM_001099697(-)//RSPH10B|NM_173565(-)	within	RSPH10B2
chr5:150009044-150009744	-2.54238	0.000205035	within:SYNPO|NM_007286(+)//SYNPO|NM_001109974(+)	within	SYNPO
chr12:131486115-131487318	-2.58246	0.000205664	left:GALNT9|NM_001122636(70137-)	left	GALNT9
chr19:776390-779440	-2.6082	0.000206297	promoter region:AZU1|NM_001700(+)	promoter region	AZU1	AZU1
chr19:62784999-62788049	-2.61464	0.000206356	promoter region:ZIK1|NM_001010879(+)	promoter region	ZIK1	ZIK1
chr5:1335596-1336297	-2.52835	0.000206489	within:TERT|NM_198253(-)//TERT|NM_198255(-)	within	TERT
chr15:19248471-19249715	-2.52723	0.000207424	left:LOC646214|NR_027053(54355-)	left	LOC646214
chr1:6124475-6125176	-2.56396	0.000208246	within:CHD5|NM_015557(-)	within	CHD5
chr12:123422281-123422982	-2.51649	0.000208846	within:NCOR2|NM_006312(-)//NCOR2|NM_001077261(-)	within	NCOR2
chr14:20179080-20182130	-2.53512	0.00020946	promoter region:OR6S1|NM_001001968(-)	promoter region	OR6S1	OR6S1
chr17_random:1432390-1433090	-2.52571	0.000211674	left:TBC1D3B|NM_001001417(139602+)	left	TBC1D3B
chr2:241640924-241641625	-2.54375	0.000211737	within:SNED1|NM_001080437(+)	within	SNED1
chr8:145119018-145124293	-2.5492	0.000212062	promoter region:PLEC|NM_201378(-)//PLEC|NM_000445(-)	promoter region	PLEC	PLEC
chr1:1876129-1876829	-2.57038	0.000212267	within:KIAA1751|NM_001080484(-)	within	KIAA1751
chr19:46047582-46050632	-2.58262	0.000214129	promoter region:CYP2A6|NM_000762(-)	promoter region	CYP2A6	CYP2A6
chr22:21813631-21818122	-2.51903	0.00021493	promoter region:RAB36|NM_004914(+)//RTDR1|NM_014433(-)	promoter region	RAB36	RAB36
chr16:2028526-2029227	-2.53077	0.000215735	left:SLC9A3R2|NM_001130012//SLC9A3R2|NM_004785(11638+)	left	SLC9A3R2
chr21_random:1592554-1593255	-2.57927	0.000219258	left:LOC100132288|NM_001033515(1427884-)	left	LOC100132288
chr11:70911014-70911714	-2.55725	0.000219268	left:NADSYN1|NM_018161(69150+)	left	NADSYN1
chr9:137290223-137291050	-2.53319	0.000222876	left:OLFM1|NM_006334(183300+)	left	OLFM1
chr9:138446101-138447114	-2.53521	0.000222879	within:INPP5E|NM_019892(-)	within	INPP5E
chr19:11521060-11521760	-2.5032	0.000224067	within:CNN1|NM_001299(+)	within	CNN1
chr17:78638656-78639357	-2.50975	0.000224628	within:METRNL|NM_001004431(+)	within	METRNL
chr2:127534232-127534933	-2.517	0.00022509	within:BIN1|NM_139348(-)//BIN1|NM_004305(-)//BIN1|NM_139346(-)//BIN1|NM_139343(-)//BIN1|NM_139350(-)//BIN1|NM_139347(-)//BIN1|NM_139351(-)//BIN1|NM_139349(-)//BIN1|NM_139345(-)//BIN1|NM_139344(-)	within	BIN1
chr16:87646127-87647336	-2.50167	0.000225396	left:CBFA2T3|NM_005187(75225-)	left	CBFA2T3
chr10:134702833-134703534	-2.50777	0.000228329	left:C10orf93|NM_173572(96779-)	left	C10orf93
chr1:27746764-27747465	-2.51443	0.000229132	within:AHDC1|NM_001029882(-)	within	AHDC1
chr10:126271141-126271841	-2.49755	0.000231843	within:LHPP|NM_022126(+)	within	LHPP
chr9:139046503-139049553	-2.50593	0.000232138	promoter region:FUT7|NM_004479(-)	promoter region	FUT7	FUT7
chr2:110575148-110579090	-2.5126	0.000232367	promoter region:LOC151009|NR_027244(-)	promoter region	LOC151009	LOC151009
chr22:49000973-49001674	-2.53979	0.000233115	within:TUBGCP6|NM_020461(-)	within	TUBGCP6
chr20:61348057-61348758	-2.50156	0.000234293	within:NKAIN4|NM_152864(-)	within	NKAIN4
chr7:100554658-100557708	-2.51208	0.000235488	promoter region:SERPINE1|NM_000602(+)	promoter region	SERPINE1	SERPINE1
chr5:179004043-179007093	-2.5465	0.000238259	promoter region:C5orf60|NM_001142306(-)	promoter region	C5orf60	C5orf60
chr9:128492686-128493387	-2.49548	0.000240141	within:LMX1B|NM_002316(+)	within	LMX1B
chrX:99548309-99554367	-2.50283	0.000240488	promoter region:PCDH19|NM_020766(-)//PCDH19|NM_001105243(-)	promoter region	PCDH19	PCDH19
chr16:87087105-87087806	-2.51366	0.000241324	within:ZFPM1|NM_153813(+)	within	ZFPM1
chrX:37964465-37967515	-2.5052	0.000241992	promoter region:SRPX|NM_006307(-)	promoter region	SRPX	SRPX
chr9:35719876-35724832	-2.95771	0.000244632	promoter region:CREB3|NM_006368(+)//TLN1|NM_006289(-)	promoter region	CREB3	CREB3
chr20:43885926-43886626	-2.57595	0.000245241	within:TNNC2|NM_003279(-)	within	TNNC2
chrX:72215242-72218516	-2.53458	0.000245308	promoter region:PABPC1L2A|NM_001012977(-)	promoter region	PABPC1L2A	PABPC1L2A
chr16:2116879-2117580	-2.49406	0.000245688	within:PKD1|NM_000296(-)//PKD1|NM_001009944(-)	within	PKD1
chr2:113384578-113389850	-2.53	0.00024716	promoter region:IL1F7|NM_173203(+)//IL1F7|NM_014439(+)//IL1F7|NM_173204(+)//IL1F7|NM_173202(+)//IL1F7|NM_173205(+)	promoter region	IL1F7	IL1F7
chr7:2152164-2152864	-2.49536	0.000247396	within:MAD1L1|NM_003550(-)//MAD1L1|NM_001013837(-)//MAD1L1|NM_001013836(-)	within	MAD1L1
chr16:969368-975328	-2.50008	0.000250401	promoter region:SOX8|NM_014587(+)	promoter region	SOX8	SOX8
chr6:149240052-149241227	-2.50833	0.000252802	within:UST|NM_005715(+)	within	UST
chr11:8009593-8010294	-2.51571	0.000253551	left:EIF3F|NM_003754(44151+)	left	EIF3F
chr7:99806563-99809613	-2.5135	0.000254393	promoter region:PILRA|NM_178272(+)//PILRA|NM_013439(+)//PILRA|NM_178273(+)	promoter region	PILRA	PILRA
chr6:41322652-41325702	-2.52628	0.000254884	promoter region:TREML2P1|NR_002794(+)	promoter region	TREML2P1	TREML2P1
chr20:32923712-32928645	-2.51186	0.000255916	promoter region:ACSS2|NM_018677(+)//ACSS2|NM_001076552(+)//GGT7|NM_178026(-)	promoter region	ACSS2	ACSS2
chr18:12767454-12768155	-2.49833	0.000257855	left:PSMG2|NM_020232(74391+)	left	PSMG2
chr11:93773623-93776673	-2.48634	0.000260976	promoter region:GPR83|NM_016540(-)	promoter region	GPR83	GPR83
chr19:2066172-2066872	-2.50083	0.000263544	within:AP3D1|NM_001077523(-)//AP3D1|NM_003938(-)	within	AP3D1
chr10:106083043-106086093	-2.50802	0.000263959	promoter region:ITPRIP|NM_033397(-)	promoter region	ITPRIP	ITPRIP
chrX:152265958-152266658	-2.53373	0.000266968	within:ZNF275|NM_001080485(+)	within	ZNF275
chr16:1094780-1095481	-2.60775	0.000267114	left:C1QTNF8|NM_207419(8535-)	left	C1QTNF8
chr1:53330753-53331453	-2.56086	0.000267364	within:SLC1A7|NM_006671(-)	within	SLC1A7
chr9:136849597-136850298	-2.50175	0.000268653	within:COL5A1|NM_000093(+)	within	COL5A1
chr7:4724095-4724796	-2.56594	0.000269638	within:FOXK1|NM_001037165(+)	within	FOXK1
chrX:152250366-152253416	-2.56839	0.000270079	promoter region:ZNF275|NM_001080485(+)	promoter region	ZNF275	ZNF275
chr8:22134818-22135518	-2.53238	0.000272145	within:PHYHIP|NM_014759(-)//PHYHIP|NM_001099335(-)	within	PHYHIP
chr19:261070-261770	-2.49446	0.000275468	within:MIER2|NM_017550(-)	within	MIER2
chr5:1518915-1520245	-2.50256	0.000280012	within:LPCAT1|NM_024830(-)	within	LPCAT1
chr5:176967761-176968462	-2.49956	0.000284513	within:B4GALT7|NM_007255(+)	within	B4GALT7
chr19:56334929-56337979	-2.48888	0.000284811	promoter region:SIGLEC7|NM_014385(+)//SIGLEC7|NM_016543(+)	promoter region	SIGLEC7	SIGLEC7
chr11:64246626-64249676	-2.49772	0.000284858	promoter region:NRXN2|NM_138732(-)//NRXN2|NM_015080(-)	promoter region	NRXN2	NRXN2
chr3:50201606-50204656	-2.48509	0.000285764	promoter region:GNAT1|NM_000172(+)//GNAT1|NM_144499(+)	promoter region	GNAT1	GNAT1
chr19:8106859-8107559	-2.47899	0.000290405	within:FBN3|NM_032447(-)	within	FBN3
chr17:18815160-18815861	-2.47768	0.000291616	within:FAM83G|NM_001039999(-)//SLC5A10|NM_152351(+)//SLC5A10|NM_001042450(+)	within	FAM83G
chr17:37220047-37224417	-2.54103	0.000291705	promoter region:FKBP10|NM_021939(+)//SC65|NM_006455(-)	promoter region	FKBP10	FKBP10
chrX:142549076-142553125	-2.50296	0.000293212	promoter region:SLITRK4|NM_173078(-)	promoter region	SLITRK4	SLITRK4
chr17:43389499-43392549	-2.47814	0.000299363	promoter region:PRR15L|NM_024320(-)	promoter region	PRR15L	PRR15L
chr16:86777432-86778132	-2.4985	0.00030089	left:BANP|NM_079837//BANP|NM_017869(234894+)	left	BANP
chr9:129714223-129714923	-2.47679	0.00030143	within:ST6GALNAC4|NM_175040(-)//ST6GALNAC4|NM_175039(-)	within	ST6GALNAC4
chr5:141213564-141214264	-2.51089	0.00030166	within:PCDH1|NM_032420(-)	within	PCDH1
chr20:3096597-3099647	-2.52179	0.000302556	promoter region:ProSAPiP1|NM_014731(-)	promoter region	ProSAPiP1	ProSAPiP1
chr1:41255792-41256493	-2.48268	0.000307351	within:SLFNL1|NM_144990(-)	within	SLFNL1
chr7:99791121-99794171	-2.48815	0.000310739	promoter region:PILRB|NM_178238(+)	promoter region	PILRB	PILRB
chr4:941580-942280	-2.48037	0.000313143	within:TMEM175|NM_032326(+)	within	TMEM175
chr21:14305192-14305893	-2.47323	0.000313443	left:C21orf81|NR_027270(30556-)	left	C21orf81
chr10:134455574-134456378	-2.48327	0.000315211	left:NKX6-2|NM_177400(6047-)	left	NKX6-2
chr19:45084176-45084877	-2.53183	0.000318905	within:FCGBP|NM_003890(-)	within	FCGBP
chr1:3501423-3502124	-2.51022	0.000320801	within:MEGF6|NM_001409(-)	within	MEGF6
chrX:74921186-74924236	-2.54875	0.000322958	promoter region:MAGEE2|NM_138703(-)	promoter region	MAGEE2	MAGEE2
chrX:153396957-153400007	-2.50725	0.000323952	promoter region:FAM3A|NM_021806(-)	promoter region	FAM3A	FAM3A
chr8:145951165-145954215	-2.51475	0.00032406	promoter region:ZNF251|NM_138367(-)	promoter region	ZNF251	ZNF251
chr9:139449053-139449753	-2.4781	0.000324794	within:ENTPD8|NM_001033113(-)//ENTPD8|NM_198585(-)	within	ENTPD8
chr3:52542049-52546573	-2.49063	0.000327137	promoter region:C3orf78|NM_001124767(+)//NT5DC2|NM_001134231(-)//NT5DC2|NM_022908(-)	promoter region	C3orf78	C3orf78
chr12:55613702-55616752	-0.670035	0.00032778	promoter region:SDR9C7|NM_148897(-)	promoter region	SDR9C7	SDR9C7
chr9:126308910-126311960	-2.49667	0.000330664	promoter region:NR5A1|NM_004959(-)	promoter region	NR5A1	NR5A1
chr7:157395551-157396252	-2.5453	0.000331796	within:PTPRN2|NM_130842(-)//PTPRN2|NM_130843(-)//PTPRN2|NM_002847(-)	within	PTPRN2
chr20:61648691-61651741	-2.48997	0.00033251	promoter region:SRMS|NM_080823(-)	promoter region	SRMS	SRMS
chr22:25159573-25160273	-2.47333	0.000335422	within:ASPHD2|NM_020437(+)	within	ASPHD2
chr22:49024917-49027967	-2.4692	0.000336162	promoter region:TUBGCP6|NM_020461(-)	promoter region	TUBGCP6	TUBGCP6
chr8:140813180-140813881	-2.49496	0.000337165	within:TRAPPC9|NM_031466(-)	within	TRAPPC9
chr7:100258991-100259691	-2.48817	0.000337884	within:EPHB4|NM_004444(-)	within	EPHB4
chr4:6975952-6976652	-2.48661	0.000339665	within:TBC1D14|NM_020773(+)//TBC1D14|NM_001113361(+)	within	TBC1D14
chr14:104954790-104957840	-2.47801	0.000344419	promoter region:MTA1|NM_004689(+)	promoter region	MTA1	MTA1
chr20:62131250-62131951	-2.49991	0.000347258	within:PRPF6|NM_012469(+)	within	PRPF6
chr16:1214645-1217695	-2.48979	0.000347822	promoter region:TPSG1|NM_012467(-)	promoter region	TPSG1	TPSG1
chr2:96167292-96170342	-2.47297	0.000348239	promoter region:ASTL|NM_001002036(-)	promoter region	ASTL	ASTL
chr7:102069864-102072914	-2.49306	0.00034867	promoter region:UPK3BL|NM_001114403(-)	promoter region	UPK3BL	UPK3BL
chr9:140060888-140061588	-2.47793	0.000350163	within:CACNA1B|NM_000718(+)	within	CACNA1B
chr7:579066-580265	-2.47802	0.000352679	within:PRKAR1B|NM_002735(-)	within	PRKAR1B
chr9:129728981-129732031	-2.46913	0.000357216	promoter region:PIP5KL1|NM_173492(-)	promoter region	PIP5KL1	PIP5KL1
chr16:14832703-14835753	-2.5025	0.000357882	promoter region:NOMO1|NM_014287(+)	promoter region	NOMO1	NOMO1
chr20:61165848-61166548	-2.4992	0.000358405	left:BHLHE23|NM_080606(57016-)	left	BHLHE23
chr8:145526150-145533863	-2.51145	0.000358522	promoter region:SCRT1|NM_031309(-)	promoter region	SCRT1	SCRT1
chr16:70451401-70452102	-2.485	0.000361669	within:ZNF821|NM_017530(-)//ATXN1L|NR_024612(+)	within	ZNF821
chr11:45895640-45901349	-2.45777	0.000362936	promoter region:PEX16|NM_004813(-)//PEX16|NM_057174(-)//GYLTL1B|NM_152312(+)	promoter region	PEX16	PEX16
chr18:74825847-74826560	-2.48926	0.000363243	left:GALR1|NM_001480(1734852+)	left	GALR1
chrX:46887134-46891993	-2.4707	0.000364734	promoter region:NDUFB11|NM_001135998(-)//NDUFB11|NM_019056(-)//NDUFB11|NR_024235(-)//RBM10|NM_005676(+)//RBM10|NM_152856(+)//NDUFB11|NR_024234(-)	promoter region	NDUFB11	NDUFB11
chr17:74501085-74501786	-2.4825	0.00036616	within:CANT1|NM_138793(-)	within	CANT1
chr6:3201720-3204770	-2.46497	0.00037199	promoter region:PSMG4|NM_001135750(+)//PSMG4|NM_001128592(+)//PSMG4|NM_001128591(+)	promoter region	PSMG4	PSMG4
chr4:3493803-3494504	-2.46833	0.000374579	within:LRPAP1|NM_002337(-)	within	LRPAP1
chr20:36506270-36512035	-2.49296	0.00037711	promoter region:SNORA39|NR_002972(+)//SNHG11|NR_003239(+)//SNORA60|NR_002986(+)	promoter region	SNORA39	SNORA39
chr2:234331217-234334267	-0.710435	0.000379958	promoter region:UGT1A1|NM_000463(+)	promoter region	UGT1A1	UGT1A1
chr14:104891733-104893020	-2.45186	0.000380399	within:PACS2|NM_001100913(+)//PACS2|NM_015197(+)	within	PACS2
chr16:80623918-80626968	-2.46667	0.000384481	promoter region:HSD17B2|NM_002153(+)	promoter region	HSD17B2	HSD17B2
chr5:553150-553850	-2.48643	0.000387672	within:SLC9A3|NM_004174(-)	within	SLC9A3
chr3:49201816-49204866	-2.57292	0.000391062	promoter region:LOC646498|NM_001080528(-)	promoter region	LOC646498	LOC646498
chr9:135902831-135903531	-2.48786	0.00039471	within:BRD3|NM_007371(-)	within	BRD3
chr19:3158688-3159389	-2.45857	0.000394921	within:NCLN|NM_020170(+)	within	NCLN
chr20:61292494-61293195	-2.49388	0.000395245	left:HAR1B|NR_003245(88378-)	left	HAR1B
chr1:159325399-159328449	-2.47078	0.000398136	promoter region:PVRL4|NM_030916(-)	promoter region	PVRL4	PVRL4
chr5:7446902-7450022	-2.46465	0.000400929	promoter region:ADCY2|NM_020546(+)	promoter region	ADCY2	ADCY2
chr16:4792065-4795115	-2.46652	0.000401139	promoter region:ROGDI|NM_024589(-)	promoter region	ROGDI	ROGDI
chrY:26036002-26039052	-2.45331	0.00040133	promoter region:CSPG4P2Y|NR_002194(+)//CSPG4P1Y|NR_001554(+)	promoter region	CSPG4P2Y	CSPG4P2Y
chr4:3218124-3221245	-2.44656	0.000407868	promoter region:C4orf44|NM_001042690(+)//C4orf44|NM_001012982(+)	promoter region	C4orf44	C4orf44
chr2:241584487-241587537	-2.45958	0.000410039	promoter region:SNED1|NM_001080437(+)	promoter region	SNED1	SNED1
chr22:48559352-48562402	-2.45368	0.000420918	promoter region:LOC90834|NR_026993(-)	promoter region	LOC90834	LOC90834
chr7:22730850-22733900	-2.49832	0.000420957	promoter region:IL6|NM_000600(+)	promoter region	IL6	IL6
chrX:123294272-123294972	-2.46571	0.000421533	left:STAG2|NM_006603//STAG2|NM_001042751//STAG2|NM_001042750(371036+)	left	STAG2
chr1:152180734-152181435	-2.46621	0.000422653	within:DENND4B|NM_014856(-)	within	DENND4B
chr11:66947764-66948465	-2.44362	0.000422909	within:CARNS1|NM_020811(+)	within	CARNS1
chr19:47189612-47192662	-2.49007	0.000424482	promoter region:ATP1A3|NM_152296(-)	promoter region	ATP1A3	ATP1A3
chr6:18372118-18375218	-2.47635	0.000427479	promoter region:DEK|NM_001134709(-)//DEK|NM_003472(-)	promoter region	DEK	DEK
chr9:125141378-125142079	-2.47094	0.000429542	left:STRBP|NM_018387(70714-)	left	STRBP
chr18:74852927-74856537	-2.45057	0.000432377	within:SALL3|NM_171999(+)	within	SALL3
chr11:2436819-2439869	-2.455	0.000432961	promoter region:KCNQ1|NM_181798(+)	promoter region	KCNQ1	KCNQ1
chr16:65984312-65987362	-2.47714	0.000435335	promoter region:TPPP3|NM_015964(-)//TPPP3|NM_016140(-)	promoter region	TPPP3	TPPP3
chr13:112683427-112684128	-2.46475	0.000437358	within:MCF2L|NM_001112732(+)//MCF2L|NM_024979(+)	within	MCF2L
chr7:285611-288882	-2.45283	0.000438718	promoter region:FAM20C|NM_020223(+)	promoter region	FAM20C	FAM20C
chr6:44340791-44343943	-2.46501	0.000442111	promoter region:NFKBIE|NM_004556(-)	promoter region	NFKBIE	NFKBIE
chr16:2223882-2228074	-2.44909	0.000442707	promoter region:DNASE1L2|NM_001374(+)	promoter region	DNASE1L2	DNASE1L2
chr2:233094858-233099775	-2.43982	0.000445229	promoter region:CHRND|NM_000751(+)	promoter region	CHRND	CHRND
chr16:3720967-3721667	-2.43729	0.000448929	within:CREBBP|NM_001079846(-)//CREBBP|NM_004380(-)	within	CREBBP
chr4:640278-641114	-2.47198	0.000453405	within:PDE6B|NM_001145292(+)//PDE6B|NM_001145291(+)//PDE6B|NM_000283(+)	within	PDE6B
chr19:53364762-53367812	-2.47583	0.000455754	promoter region:LIG1|NM_000234(-)	promoter region	LIG1	LIG1
chr1:226534503-226535204	-2.46635	0.000455849	within:OBSCN|NM_052843(+)//OBSCN|NM_001098623(+)	within	OBSCN
chr4:189317691-189318392	-2.56511	0.000460479	left:TRIML1|NM_178556(20100+)	left	TRIML1
chr5:140168198-140169170	-2.48471	0.000460567	within:PCDHA4|NM_018907(+)//PCDHA4|NM_031500(+)//PCDHA3|NM_018906(+)//PCDHA2|NM_018905(+)//PCDHA1|NM_031411(+)//PCDHA1|NM_018900(+)	within	PCDHA4
chr17:76471993-76472693	-2.47067	0.000462819	within:RPTOR|NM_020761(+)	within	RPTOR
chr20:62137496-62141174	-2.47298	0.000468332	promoter region:NCRNA00176|NM_207349(+)	promoter region	NCRNA00176	NCRNA00176
chr18:46120289-46120989	-2.43495	0.000472525	left:CXXC1|NM_014593//CXXC1|NM_001101654(51599-)	left	CXXC1
chr17:75802689-75803852	-2.46133	0.00047343	within:SGSH|NM_000199(-)	within	SGSH
chr6:150367363-150370413	-2.45421	0.000477568	promoter region:RAET1K|NR_024045(-)	promoter region	RAET1K	RAET1K
chr8:145620032-145620732	-2.44657	0.00048479	within:VPS28|NM_183057(-)//VPS28|NM_016208(-)	within	VPS28
chr7:149189125-149189826	-2.4749	0.000496969	within:ZNF862|NM_001099220(+)	within	ZNF862
chrX:151399570-151400271	-2.46436	0.00050054	left:GABRA3|NM_000808(29083-)	left	GABRA3
chr19:53994448-53995149	-2.465	0.000503948	within:BCAT2|NM_001190(-)	within	BCAT2
chr11:64446315-64449365	-2.42772	0.000504962	promoter region:PPP2R5B|NM_006244(+)	promoter region	PPP2R5B	PPP2R5B
chr22:18327629-18330679	-2.43564	0.000515005	promoter region:COMT|NM_007310(+)	promoter region	COMT	COMT
chr11:1210424-1211125	-2.42885	0.000517759	within:MUC5AC|NM_017511(+)//MUC5B|NM_002458(+)	within	MUC5AC
chr16:88304519-88306290	-2.50708	0.000518436	within:C16orf7|NM_004913(-)	within	C16orf7
chr9:89510730-89511431	-2.58812	0.000519	within:DAPK1|NM_004938(+)	within	DAPK1
chr22:19646977-19652056	-2.43038	0.000520294	promoter region:AIFM3|NR_027464(+)//AIFM3|NM_001146288(+)//AIFM3|NM_144704(+)//AIFM3|NM_001018060(+)	promoter region	AIFM3	AIFM3
chr11:1198431-1201481	-2.47739	0.000520939	promoter region:MUC5B|NM_002458(+)	promoter region	MUC5B	MUC5B
chr10:48877221-48880271	-2.44842	0.000526433	promoter region:FAM25B|NM_001137556(-)//FAM25C|NM_001137548(-)//FAM25G|NM_001137549(-)	promoter region	FAM25B	FAM25B
chr17:77954821-77955522	-2.43438	0.000528406	within:C17orf101|NM_175902(-)//C17orf101|NM_024648(-)	within	C17orf101
chrX:48249874-48253725	-2.47185	0.000532082	promoter region:PORCN|NM_203475(+)//PORCN|NM_203476(+)//PORCN|NM_022825(+)//PORCN|NM_203474(+)//PORCN|NM_203473(+)	promoter region	PORCN	PORCN
chr11:1218566-1219267	-2.42491	0.000549344	within:MUC5AC|NM_017511(+)//MUC5B|NM_002458(+)	within	MUC5AC
chr20:35238429-35243828	-2.44094	0.000555892	promoter region:RPN2|NM_002951(+)//C20orf132|NM_152503(-)//RPN2|NM_001135771(+)//C20orf132|NM_213632(-)//C20orf132|NM_213631(-)	promoter region	RPN2	RPN2
chr16:28794869-28797919	-2.42742	0.000557178	promoter region:ATP2A1|NM_004320(+)//ATP2A1|NM_173201(+)	promoter region	ATP2A1	ATP2A1
chr5:140236457-140237474	-2.50381	0.000558386	within:PCDHA12|NM_018903(+)//PCDHA12|NM_031864(+)//PCDHA11|NM_018902(+)//PCDHA10|NM_018901(+)//PCDHA10|NM_031860(+)//PCDHA9|NM_031857(+)//PCDHA8|NM_018911(+)//PCDHA7|NM_018910(+)//PCDHA6|NM_018909(+)//PCDHA6|NM_031849(+)//PCDHA5|NM_018908(+)//PCDHA4|NM_018907(+)//PCDHA3|NM_018906(+)//PCDHA2|NM_018905(+)//PCDHA1|NM_031411(+)//PCDHA1|NM_018900(+)	within	PCDHA12
chr21:43729188-43729888	-2.49583	0.000558699	left:C21orf84|NR_026863(6657-)	left	C21orf84
chr16:66239476-66241425	-2.43063	0.000562098	within:RLTPR|NM_001013838(+)	within	RLTPR
chr6:150431285-150434335	-2.43441	0.000567539	promoter region:ULBP3|NM_024518(-)	promoter region	ULBP3	ULBP3
chr9:139896740-139897440	-2.48105	0.00056783	within:CACNA1B|NM_000718(+)	within	CACNA1B
chr22:22074189-22077239	-2.4706	0.000569937	promoter region:ZDHHC8P1|NR_003950(-)	promoter region	ZDHHC8P1	ZDHHC8P1
chr4:9688193-9688893	-2.55119	0.00057993	within:WDR1|NM_017491(-)//WDR1|NM_005112(-)	within	WDR1
chr2:241043848-241047230	-2.42174	0.000591973	promoter region:PP14571|NR_024014(-)	promoter region	PP14571	PP14571
chr5:1392522-1393222	-2.45095	0.000592663	within:CLPTM1L|NM_030782(-)	within	CLPTM1L
chr22:35584535-35587585	-2.50874	0.000594844	promoter region:NCF4|NM_013416(+)//NCF4|NM_000631(+)	promoter region	NCF4	NCF4
chr15:76073012-76076062	-2.42649	0.000602586	promoter region:LOC91450|NR_026998(-)	promoter region	LOC91450	LOC91450
chr20:3658915-3661965	-2.44223	0.000609146	promoter region:HSPA12B|NM_052970(+)	promoter region	HSPA12B	HSPA12B
chr11:68206118-68209422	-2.41611	0.000609493	promoter region:GAL|NM_015973(+)	promoter region	GAL	GAL
chr17:70220093-70223143	-2.45992	0.000611007	promoter region:CD300LF|NM_139018(-)	promoter region	CD300LF	CD300LF
chr16:615673-616374	-2.41635	0.000614571	within:RAB40C|NM_021168(+)	within	RAB40C
chr19:1263787-1264528	-2.41168	0.000619774	left:EFNA2|NM_001405(26620+)	left	EFNA2
chr19:63527756-63530806	-2.47979	0.000622681	promoter region:ZSCAN22|NM_181846(+)	promoter region	ZSCAN22	ZSCAN22
chr19:1929370-1930984	-2.43622	0.000624881	within:CSNK1G2|NM_001319(+)	within	CSNK1G2
chr22:44697204-44697904	-2.40833	0.000630051	within:WNT7B|NM_058238(-)	within	WNT7B
chr21:44566758-44567459	-2.4064	0.000630363	within:PFKL|NM_002626(+)//PFKL|NR_024108(+)	within	PFKL
chr16:554592-560614	-2.42279	0.000641474	promoter region:PIGQ|NM_004204(+)//NHLRC4|NM_176677(+)//PIGQ|NM_148920(+)	promoter region	PIGQ	PIGQ
chr19:60689241-60692291	-2.42047	0.000642774	promoter region:SSC5D|NM_001144950(+)	promoter region	SSC5D	SSC5D
chr19:55601813-55602513	-2.43321	0.000659239	within:POLD1|NM_002691(+)	within	POLD1
chr7:62678333-62679033	-2.43976	0.000672741	left:LOC643955|NR_003952(276464-)	left	LOC643955
chr17:43253536-43256586	-2.40813	0.000680905	promoter region:OSBPL7|NM_145798(-)	promoter region	OSBPL7	OSBPL7
chr5:179238483-179239183	-2.61189	0.000681196	within:TBC1D9B|NM_015043(-)//TBC1D9B|NM_198868(-)	within	TBC1D9B
chr9:139261433-139266160	-2.46062	0.000682392	promoter region:C9orf173|NM_001004353(+)//FAM166A|NM_001001710(-)	promoter region	C9orf173	C9orf173
chr3:52784207-52787257	-2.44271	0.000687295	promoter region:ITIH1|NM_002215(+)	promoter region	ITIH1	ITIH1
chrX:243871-244571	-2.43345	0.000688122	within:PPP2R3B|NM_013239(-)	within	PPP2R3B
chr19:6180854-6181912	-2.50506	0.000692429	within:MLLT1|NM_005934(-)	within	MLLT1
chr19:47790312-47793362	-2.4442	0.000695033	promoter region:CEACAM8|NM_001816(-)	promoter region	CEACAM8	CEACAM8
chr10:92967908-92970958	2.00083	0.000696852	promoter region:PCGF5|NM_032373(+)	promoter region	PCGF5	PCGF5
chr6:136723354-136724055	-2.58646	0.000697716	within:MAP7|NM_003980(-)	within	MAP7
chr1:154603186-154606236	-2.40479	0.000698719	promoter region:RHBG|NM_020407(+)//RHBG|NR_026549(+)	promoter region	RHBG	RHBG
chr14:19967824-19970874	-2.39595	0.000699644	promoter region:KLHL33|NM_001109997(-)	promoter region	KLHL33	KLHL33
chr1:245341208-245344782	-2.42917	0.00070657	promoter region:C1orf229|NM_207401(-)	promoter region	C1orf229	C1orf229
chr6:34208811-34211861	-2.40375	0.000717412	promoter region:GRM4|NM_000841(-)	promoter region	GRM4	GRM4
chr20:61424252-61424952	-2.40827	0.000722022	within:COL20A1|NM_020882(+)	within	COL20A1
chr16:1332299-1334077	-2.4006	0.000724389	within:BAIAP3|NM_003933(+)	within	BAIAP3
chr16:714518-719418	-2.39432	0.000725649	promoter region:HAGHL|NM_032304(+)//CCDC78|NM_001031737(-)//HAGHL|NM_207112(+)	promoter region	HAGHL	HAGHL
chr22:37705910-37708960	-2.39938	0.000732845	promoter region:APOBEC3B|NM_004900(+)	promoter region	APOBEC3B	APOBEC3B
chr2:238723923-238724624	-2.41562	0.000733676	within:KLHL30|NM_198582(+)	within	KLHL30
chr9:137333115-137333816	-2.41792	0.000753953	left:OLFM1|NM_006334(226192+)	left	OLFM1
chrY:211398-215968	-2.48537	0.000764268	left:GTPBP6|NM_012227(40511-)	left	GTPBP6
chr15:73435259-73435960	-2.38996	0.000766235	within:MAN2C1|NM_006715(-)	within	MAN2C1
chr5:135554955-135559190	-2.39809	0.000767239	promoter region:LOC389332|NR_024418(-)	promoter region	LOC389332	LOC389332
chr6:168427267-168427967	-2.42202	0.000773114	left:FRMD1|NM_024919(204579-)	left	FRMD1
chr3:37876232-37879282	-2.45371	0.000779294	promoter region:CTDSPL|NM_005808(+)//CTDSPL|NM_001008392(+)	promoter region	CTDSPL	CTDSPL
chr19:63683397-63684098	-2.41229	0.000780417	within:ZNF446|NM_017908(+)	within	ZNF446
chr8:144963519-144964220	-2.41667	0.000784868	within:SCRIB|NM_182706(-)//SCRIB|NM_015356(-)	within	SCRIB
chr2:27454662-27455363	-2.39562	0.000785375	within:ZNF513|NM_144631(-)	within	ZNF513
chr19:61824970-61825996	-2.38208	0.000796559	within:ZNF71|NM_021216(+)	within	ZNF71
chr15:20666355-20667055	-2.44686	0.000797881	left:NIPA1|NM_001142275(28071-)	left	NIPA1
chr21:45234577-45235278	-2.38037	0.000817838	left:C21orf70|NM_058190(50195+)	left	C21orf70
chr19:532112-532812	-2.39083	0.000819593	within:BSG|NM_198591(+)//BSG|NM_001728(+)//BSG|NM_198589(+)	within	BSG
chr9:139083976-139087289	-2.41308	0.000826211	promoter region:C9orf140|NM_178448(-)	promoter region	C9orf140	C9orf140
chr19:39914879-39917929	-2.39496	0.000827056	promoter region:ZNF181|NM_001145665(+)//ZNF181|NM_001029997(+)	promoter region	ZNF181	ZNF181
chr21:45245447-45246148	-2.41281	0.000830054	within:NCRNA00162|NR_024089(-)	within	NCRNA00162
chr11:56950489-56954069	-2.41442	0.000830452	promoter region:SLC43A3|NM_017611(-)//SLC43A3|NM_014096(-)//SLC43A3|NM_199329(-)	promoter region	SLC43A3	SLC43A3
chr17:1340947-1345191	-2.38568	0.000832043	promoter region:MYO1C|NM_033375(-)//MYO1C|NM_001080779(-)	promoter region	MYO1C	MYO1C
chr3:88111975-88115025	-2.39058	0.000832401	promoter region:HTR1F|NM_000866(+)	promoter region	HTR1F	HTR1F
chr7:74888921-74889622	-0.544687	0.000833421	within:POM121C|NM_001099415(-)	within	POM121C
chr17:72980479-72983529	-2.37462	0.00085861	promoter region:SEPT9|NM_001113495(+)	promoter region	SEPT9	SEPT9
chr19:39759867-39762917	-2.39195	0.000859181	promoter region:LOC643719|NR_027620(-)	promoter region	LOC643719	LOC643719
chr11:117203407-117206457	-2.38044	0.000866733	promoter region:FXYD2|NM_021603(-)	promoter region	FXYD2	FXYD2
chr1:35142961-35146011	-2.37772	0.00087112	promoter region:DLGAP3|NM_001080418(-)	promoter region	DLGAP3	DLGAP3
chr13:112154091-112154792	-2.40654	0.000871447	left:C13orf28|NM_145248(75422+)	left	C13orf28
chr16:88189072-88189772	-2.40907	0.000878529	within:CPNE7|NM_014427(+)//CPNE7|NM_153636(+)	within	CPNE7
chr5:242185-245544	-2.37787	0.000883257	promoter region:LRRC14B|NM_001080478(+)	promoter region	LRRC14B	LRRC14B
chr7:50435060-50435894	-2.45278	0.000899596	within:IKZF1|NM_006060(+)	within	IKZF1
chr17:3421139-3421840	-2.37229	0.000915262	within:TRPV1|NM_080706(-)//TRPV1|NM_080705(-)//TRPV1|NM_018727(-)//TRPV1|NM_080704(-)	within	TRPV1
chr9:21982349-21986930	-2.398	0.000923541	promoter region:CDKN2BAS|NR_003529(+)//CDKN2A|NM_058195(-)	promoter region	CDKN2BAS	CDKN2BAS
chr9:139563689-139567247	-2.39091	0.000925325	promoter region:PNPLA7|NM_001098537(-)//MRPL41|NM_032477(+)//PNPLA7|NM_152286(-)	promoter region	PNPLA7	PNPLA7
chr7:157102454-157103155	-2.38943	0.000930505	within:PTPRN2|NM_130842(-)//PTPRN2|NM_130843(-)//PTPRN2|NM_002847(-)	within	PTPRN2
chr1:1204911-1208048	-2.38938	0.000932749	promoter region:SCNN1D|NM_001130413(+)//SCNN1D|NM_002978(+)	promoter region	SCNN1D	SCNN1D
chr17:68769004-68772054	-2.37	0.000937865	promoter region:CPSF4L|NM_001129885(-)	promoter region	CPSF4L	CPSF4L
chr2:242223259-242227768	-2.37589	0.000940385	promoter region:ATG4B|NM_178326(+)//ATG4B|NM_013325(+)//THAP4|NM_015963(-)	promoter region	ATG4B	ATG4B
chr13:112472652-112473353	-2.65054	0.000942697	within:ATP11A|NM_032189(+)//ATP11A|NM_015205(+)	within	ATP11A
chr16:56494901-56495602	-2.40844	0.000948305	within:CNGB1|NM_001297(-)	within	CNGB1
chrX:132179432-132182482	-2.37696	0.000959931	promoter region:TFDP3|NM_016521(-)	promoter region	TFDP3	TFDP3
chr22:18023788-18024488	-2.37543	0.00096916	left:LOC150185|NR_024381(89426-)	left	LOC150185
chr11:64928708-64929409	-2.39217	0.000985587	within:FRMD8|NM_031904(+)	within	FRMD8
chr19:56694849-56699295	-2.36585	0.000986075	promoter region:SIGLEC12|NM_033329(-)//SIGLEC12|NM_053003(-)	promoter region	SIGLEC12	SIGLEC12
chr12:90029063-90032113	2.0925	0.000988723	promoter region:LUM|NM_002345(-)	promoter region	LUM	LUM
chr9:139242765-139245815	-2.35993	0.00099609	promoter region:SLC34A3|NM_080877(+)	promoter region	SLC34A3	SLC34A3
chr1:2329571-2330271	-2.39738	0.00100954	within:PEX10|NM_002617(-)//PEX10|NM_153818(-)	within	PEX10
chrX:99959563-99962613	-2.56375	0.00101836	promoter region:CSTF2|NM_001325(+)	promoter region	CSTF2	CSTF2
chr19:4252818-4256200	-2.36417	0.00103571	promoter region:TMIGD2|NM_144615(-)//FSD1|NM_024333(+)	promoter region	TMIGD2	TMIGD2
chr14:103070415-103071116	-2.35746	0.00104037	within:TRMT61A|NM_152307(+)	within	TRMT61A
chr16:86082351-86085401	-2.36409	0.00104719	promoter region:ZCCHC14|NM_015144(-)	promoter region	ZCCHC14	ZCCHC14
chr3:110538499-110541549	2.105	0.00105167	promoter region:DPPA4|NM_018189(-)	promoter region	DPPA4	DPPA4
chr7:150316639-150319689	-2.36485	0.00108156	promoter region:NOS3|NM_000603(+)	promoter region	NOS3	NOS3
chr16:87329708-87332758	-2.36496	0.00111252	promoter region:FAM38A|NM_001142864(-)	promoter region	FAM38A	FAM38A
chr19:1875293-1875994	-2.43483	0.00111721	within:SCAMP4|NM_079834(+)	within	SCAMP4
chr1:11029262-11032312	-2.35853	0.00113232	promoter region:MASP2|NM_139208(-)//MASP2|NM_006610(-)	promoter region	MASP2	MASP2
chr12:51781100-51784150	-0.502478	0.0011361	promoter region:SOAT2|NM_003578(+)	promoter region	SOAT2	SOAT2
chr19:2758224-2759386	-2.35667	0.00113959	within:THOP1|NM_003249(+)	within	THOP1
chr2:61095875-61101309	2.12583	0.00115452	promoter region:PEX13|NM_002618(+)//PUS10|NM_144709(-)	promoter region	PEX13	PEX13
chr17:76746226-76746927	-2.35161	0.00116247	within:AATK|NM_001080395(-)	within	AATK
chr6:170432325-170433025	2.12833	0.00116954	left:LOC154449|NR_002787(18743-)	left	LOC154449
chr8:141177019-141180166	-2.35871	0.0011785	within:TRAPPC9|NM_031466(-)	within	TRAPPC9
chr2:79591193-79594243	2.125	0.00117989	promoter region:CTNNA2|NM_004389(+)	promoter region	CTNNA2	CTNNA2
chr4:90976540-90980910	2.12536	0.00118739	promoter region:SNCA|NM_007308(-)//SNCA|NM_001146054(-)//SNCA|NM_000345(-)//SNCA|NM_001146055(-)	promoter region	SNCA	SNCA
chr5:140243269-140244338	-2.39346	0.00118884	within:PCDHA13|NM_018904(+)//PCDHA13|NM_031865(+)//PCDHA12|NM_018903(+)//PCDHA11|NM_018902(+)//PCDHA10|NM_018901(+)//PCDHA10|NM_031860(+)//PCDHA9|NM_031857(+)//PCDHA8|NM_018911(+)//PCDHA7|NM_018910(+)//PCDHA6|NM_018909(+)//PCDHA6|NM_031849(+)//PCDHA5|NM_018908(+)//PCDHA4|NM_018907(+)//PCDHA3|NM_018906(+)//PCDHA2|NM_018905(+)//PCDHA1|NM_031411(+)//PCDHA1|NM_018900(+)	within	PCDHA13
chr11:108795644-108798694	-2.35117	0.00120332	promoter region:C11orf87|NM_207645(+)	promoter region	C11orf87	C11orf87
chr3:49881741-49884813	-2.34062	0.00120693	promoter region:CAMKV|NM_024046(-)	promoter region	CAMKV	CAMKV
chr10:72100124-72103174	-2.34262	0.00122444	promoter region:ADAMTS14|NM_080722(+)//ADAMTS14|NM_139155(+)	promoter region	ADAMTS14	ADAMTS14
chr5:112657901-112660951	2.144	0.00125782	promoter region:MCC|NM_002387(-)	promoter region	MCC	MCC
chr3:9007038-9007738	-2.33726	0.00127115	within:SRGAP3|NM_001033117(-)//SRGAP3|NM_014850(-)	within	SRGAP3
chr18:75409062-75409803	-2.35708	0.00127769	left:NFATC1|NM_172389//NFATC1|NM_172387(147749+)	left	NFATC1
chr17:17049496-17052797	-2.34667	0.00129304	promoter region:PLD6|NM_178836(-)	promoter region	PLD6	PLD6
chr18:19704541-19707591	2.15833	0.00132912	promoter region:LAMA3|NM_001127718(+)//LAMA3|NM_000227(+)	promoter region	LAMA3	LAMA3
chr16:33047580-33048280	-2.38	0.00134174	left:SLC6A10P|NR_003083(243616-)	left	SLC6A10P
chr5:10404387-10407512	2.16214	0.00135152	promoter region:MARCH6|NM_005885(+)	promoter region	MARCH6	MARCH6
chr13:110011462-110014512	2.16542	0.00137009	promoter region:RAB20|NM_017817(-)	promoter region	RAB20	RAB20
chr3:151010724-151013921	2.1625	0.00137129	promoter region:RNF13|NM_183381(+)//RNF13|NM_007282(+)	promoter region	RNF13	RNF13
chr6:29080406-29083456	1.83083	0.00138805	promoter region:ZNF311|NM_001010877(-)	promoter region	ZNF311	ZNF311
chr9:138674757-138677812	-2.32298	0.00141333	promoter region:EGFL7|NM_201446(+)//EGFL7|NM_016215(+)	promoter region	EGFL7	EGFL7
chr15:89163205-89163906	-2.32308	0.00144376	left:BLM|NM_000057(101623+)	left	BLM
chr19:60795540-60796783	-2.40875	0.00145014	within:FIZ1|NM_032836(-)	within	FIZ1
chr11:94344052-94348864	2.18214	0.00147069	promoter region:CWC15|NM_016403(-)//KDM4D|NM_018039(+)	promoter region	CWC15	CWC15
chr19:62636064-62639114	2.15687	0.0014747	promoter region:ZNF749|NM_001023561(+)	promoter region	ZNF749	ZNF749
chr3:73755917-73759202	2.17967	0.00149985
chrX:56604356-56607406	2.18792	0.00150577	promoter region:UBQLN2|NM_013444(+)	promoter region	UBQLN2	UBQLN2
chr7:2532169-2532869	2.18167	0.0015097	within:LFNG|NM_001040168(+)//LFNG|NM_001040167(+)	within	LFNG
chr19:23369499-23372549	2.18875	0.00151758	promoter region:ZNF91|NM_003430(-)	promoter region	ZNF91	ZNF91
chr1:171286116-171289166	2.18833	0.00153037	promoter region:TNFSF18|NM_005092(-)	promoter region	TNFSF18	TNFSF18
chr3:193927472-193930522	2.19333	0.00154084	promoter region:FGF12|NM_004113(-)	promoter region	FGF12	FGF12
chr2:241172377-241175508	-2.31505	0.00155007	promoter region:CAPN10|NM_023083(+)//CAPN10|NM_021251(+)//CAPN10|NM_023085(+)//CAPN10|NM_023089(+)	promoter region	CAPN10	CAPN10
chr16:28739474-28743374	2.2	0.00159514	promoter region:ATXN2L|NM_145714(+)//ATXN2L|NM_148415(+)//ATXN2L|NM_148414(+)//ATXN2L|NM_148416(+)//ATXN2L|NM_007245(+)	promoter region	ATXN2L	ATXN2L
chr16:83616470-83619520	2.20614	0.00162178	promoter region:KIAA0513|NM_014732(+)	promoter region	KIAA0513	KIAA0513
chr13:32657606-32660656	2.20893	0.00165045	promoter region:STARD13|NM_178007(-)	promoter region	STARD13	STARD13
chr21:34365252-34368349	2.21062	0.00165047
chr9:18766758-18767743	-2.31625	0.00165997	within:ADAMTSL1|NM_001040272(+)	within	ADAMTSL1
chr4:1826863-1830212	2.20833	0.00169269	promoter region:LETM1|NM_012318(-)	promoter region	LETM1	LETM1
chrX:129864279-129867329	-2.31158	0.00169558	promoter region:ENOX2|NM_182314(-)//ENOX2|NM_006375(-)	promoter region	ENOX2	ENOX2
chr17:78134590-78135655	2.21583	0.00169803	within:FOXK2|NM_004514(+)	within	FOXK2
chr9:21021025-21024075	2.20229	0.0016982	promoter region:PTPLAD2|NM_001010915(-)	promoter region	PTPLAD2	PTPLAD2
chr6_random:1286715-1305180	2.21833	0.00170439	left:C6orf124|NM_001042508(472523-)	left	C6orf124
chr6:112300528-112303760	2.20967	0.00170829	promoter region:FYN|NM_002037(-)	promoter region	FYN	FYN
chrX:70712158-70715263	-2.35938	0.00171619	promoter region:ACRC|NM_052957(+)	promoter region	ACRC	ACRC
chr3:43300567-43303617	2.219	0.00172669	promoter region:SNRK|NM_017719(+)//SNRK|NM_001100594(+)	promoter region	SNRK	SNRK
chrX:139617157-139620207	2.21	0.00173269	promoter region:RP1-177G6.2|NM_001126492(+)	promoter region	RP1-177G6.2	RP1-177G6.2
chr12:68037358-68040408	2.2225	0.00173385	promoter region:YEATS4|NM_006530(+)	promoter region	YEATS4	YEATS4
chrX:55036626-55039676	2.21708	0.001748	promoter region:PFKFB1|NM_002625(-)	promoter region	PFKFB1	PFKFB1
chr1:120112431-120115481	2.225	0.00174833	promoter region:HMGCS2|NM_005518(-)	promoter region	HMGCS2	HMGCS2
chr1:144426312-144429362	2.22925	0.00179165	promoter region:CD160|NM_007053(-)	promoter region	CD160	CD160
chr16:629409-632701	-2.32	0.00179409	promoter region:FAM195A|NM_138418(+)	promoter region	FAM195A	FAM195A
chr10:11084824-11087874	2.21833	0.00180396	promoter region:CELF2|NM_001025077(+)	promoter region	CELF2	CELF2
chr13:44459246-44464053	2.23125	0.00181204	promoter region:NUFIP1|NM_012345(-)//KIAA1704|NM_018559(+)	promoter region	NUFIP1	NUFIP1
chr1:226466094-226468660	-2.31387	0.00181463	within:OBSCN|NM_052843(+)//OBSCN|NM_001098623(+)	within	OBSCN
chr10:96941506-96944556	2.238	0.00186548	promoter region:C10orf129|NM_207321(+)	promoter region	C10orf129	C10orf129
chr7:23303024-23306074	2.24271	0.00186999	promoter region:C7orf30|NM_138446(+)	promoter region	C7orf30	C7orf30
chr9:135834068-135834769	-2.30135	0.00187495	within:VAV2|NM_001134398(-)//VAV2|NM_003371(-)	within	VAV2
chr16:82557297-82560416	2.23167	0.00191622	promoter region:NECAB2|NM_019065(+)	promoter region	NECAB2	NECAB2
chr2:171795460-171798510	2.249	0.00191737	promoter region:TLK1|NM_001136554(-)	promoter region	TLK1	TLK1
chr6:163065713-163071264	2.25	0.00192082	promoter region:PACRG|NM_001080379(+)//PACRG|NM_152410(+)//PARK2|NM_013987(-)//PACRG|NM_001080378(+)//PARK2|NM_004562(-)//PARK2|NM_013988(-)	promoter region	PACRG	PACRG
chr11:47530487-47533704	2.25	0.00192415	promoter region:CELF1|NM_006560(-)	promoter region	CELF1	CELF1
chr18:75320015-75320716	2.251	0.00193168	within:NFATC1|NM_172390(+)//NFATC1|NM_172388(+)//NFATC1|NM_006162(+)//NFATC1|NM_172387(+)//NFATC1|NM_172389(+)	within	NFATC1
chr10:11821921-11825028	2.239	0.00194103	promoter region:ECHDC3|NM_024693(+)	promoter region	ECHDC3	ECHDC3
chr19:20398992-20402042	2.24667	0.00196398	promoter region:ZNF826P|NM_001039884(-)	promoter region	ZNF826P	ZNF826P
chr20:42713180-42716230	2.24304	0.00197078	promoter region:ADA|NM_000022(-)	promoter region	ADA	ADA
chr20:8058855-8061905	2.26127	0.00200701	promoter region:PLCB1|NM_015192(+)//PLCB1|NM_182734(+)	promoter region	PLCB1	PLCB1
chr17:29705143-29708193	2.2615	0.00202085	promoter region:CCL13|NM_005408(+)	promoter region	CCL13	CCL13
chr4:71046400-71049450	2.26125	0.0020234	promoter region:|NR_003721(-)	promoter region
chr3:121795377-121798427	2.26313	0.00204121	promoter region:NDUFB4|NM_004547(+)	promoter region	NDUFB4	NDUFB4
chr22:22676648-22679698	-2.33236	0.00204235	promoter region:GSTTP1|NR_003081(-)	promoter region	GSTTP1	GSTTP1
chr6:158875015-158878665	2.26667	0.00204823	promoter region:TMEM181|NM_020823(+)	promoter region	TMEM181	TMEM181
chrX:65176082-65179132	2.24583	0.00204959	promoter region:VSIG4|NM_007268(-)//VSIG4|NM_001100431(-)	promoter region	VSIG4	VSIG4
chr11:72085579-72086280	-2.285	0.00205984	within:ARAP1|NM_001135190(-)//ARAP1|NM_015242(-)//ARAP1|NM_001040118(-)	within	ARAP1
chr20:1109423-1110123	2.2715	0.00208406	within:C20orf46|NM_018354(-)	within	C20orf46
chr2:73971160-73974210	2.26167	0.00209906	promoter region:ACTG2|NM_001615(+)	promoter region	ACTG2	ACTG2
chr1:33558676-33561726	2.26	0.00210298	promoter region:A3GALT2|NM_001080438(-)	promoter region	A3GALT2	A3GALT2
chr21:32372059-32375109	2.27667	0.00212136	promoter region:NCRNA00159|NR_024352(+)	promoter region	NCRNA00159	NCRNA00159
chr2:197382635-197385685	2.2785	0.00213188	promoter region:C2orf66|NM_213608(-)	promoter region	C2orf66	C2orf66
chr8:145262219-145265525	-2.29476	0.00213226	promoter region:C8orf30A|NM_016458(+)	promoter region	C8orf30A	C8orf30A
chr22:23331214-23334264	-2.28144	0.00215052	promoter region:GGT1|NM_001032365(+)	promoter region	GGT1	GGT1
chr1:178100324-178103374	2.27898	0.00216307	promoter region:TOR1AIP2|NM_022347(-)	promoter region	TOR1AIP2	TOR1AIP2
chr19:18749032-18749969	-2.29271	0.00216378	within:CRTC1|NM_001098482(+)//CRTC1|NM_015321(+)	within	CRTC1
chrX:111952400-111955450	2.2565	0.00216971	promoter region:AMOT|NM_001113490(-)	promoter region	AMOT	AMOT
chr3:129324751-129327801	-0.564696	0.00217312	promoter region:RUVBL1|NM_003707(-)	promoter region	RUVBL1	RUVBL1
chr19:3909492-3910812	2.2835	0.00220299	within:DAPK3|NM_001348(-)	within	DAPK3
chr19:53491949-53492650	2.27857	0.00220302	within:CCDC114|NM_144577(-)	within	CCDC114
chr13:24759094-24762144	2.28833	0.00220945	promoter region:MTMR6|NM_004685(-)	promoter region	MTMR6	MTMR6
chr6:169891205-169896003	2.26333	0.00229699	promoter region:C6orf70|NM_018341(+)//TCTE3|NM_174910(-)	promoter region	C6orf70	C6orf70
chr6:130072453-130075503	2.28667	0.00230509	promoter region:ARHGAP18|NM_033515(-)	promoter region	ARHGAP18	ARHGAP18
chr15:19912625-19915675	2.2975	0.00230691	promoter region:OR4N3P|NM_001080841(+)	promoter region	OR4N3P	OR4N3P
chr19:12890476-12893526	2.29875	0.00231035	promoter region:SYCE2|NM_001105578(-)	promoter region	SYCE2	SYCE2
chr1:27922636-27925686	2.30571	0.00234079	promoter region:FAM76A|NM_001143915(+)//FAM76A|NM_152660(+)//FAM76A|NM_001143913(+)//FAM76A|NM_001143912(+)//FAM76A|NM_001143914(+)	promoter region	FAM76A	FAM76A
chr9:124328783-124331833	2.3002	0.00236985	promoter region:OR1N1|NM_012363(-)	promoter region	OR1N1	OR1N1
chr8:133210522-133211223	-0.504833	0.00238939	within:KCNQ3|NM_004519(-)	within	KCNQ3
chr1:74434073-74438899	2.31	0.00239364	promoter region:LRRIQ3|NM_001105659(-)//FPGT|NM_003838(+)//TNNI3K|NM_001112808(+)	promoter region	LRRIQ3	LRRIQ3
chrX:37732573-37735623	2.3075	0.00241892	promoter region:CXorf27|NM_012274(+)	promoter region	CXorf27	CXorf27
chr2:237986979-237990029	2.3175	0.0024361	promoter region:COL6A3|NM_057165(-)//COL6A3|NM_057166(-)//COL6A3|NM_004369(-)//COL6A3|NM_057167(-)//COL6A3|NM_057164(-)	promoter region	COL6A3	COL6A3
chr7:107230304-107233354	2.31583	0.00243697	promoter region:SLC26A3|NM_000111(-)	promoter region	SLC26A3	SLC26A3
chr10:13738568-13739546	2.31778	0.00244107	within:FRMD4A|NM_018027(-)	within	FRMD4A
chr15:39361052-39364102	2.315	0.00244858	promoter region:LOC729082|NR_026757(+)	promoter region	LOC729082	LOC729082
chr5:139402260-139405503	2.31833	0.00244892	promoter region:NRG2|NM_013982(-)//NRG2|NM_004883(-)//NRG2|NM_013983(-)//NRG2|NM_013981(-)	promoter region	NRG2	NRG2
chr5:35083223-35086273	2.31833	0.00245776	promoter region:AGXT2|NM_031900(-)	promoter region	AGXT2	AGXT2
chr15:79273833-79276883	-0.535778	0.00246337	promoter region:IL16|NM_172217(+)	promoter region	IL16	IL16
chr10:101369601-101372651	2.32183	0.00246961	promoter region:SLC25A28|NM_031212(-)	promoter region	SLC25A28	SLC25A28
chr16:67721559-67726425	2.29625	0.00248356	promoter region:CHTF8|NM_001040144(-)//CHTF8|NM_001039690(-)//CHTF8|NM_001040146(-)//CIRH1A|NM_032830(+)	promoter region	CHTF8	CHTF8
chr17:38090449-38091150	-2.2735	0.00249041	within:CNTNAP1|NM_003632(+)	within	CNTNAP1
chrX:68442095-68442796	2.31833	0.00249475	left:PJA1|NM_022368(140030-)	left	PJA1
chr1:228842384-228845434	2.3	0.00249548	promoter region:COG2|NM_001145036(+)//COG2|NM_007357(+)	promoter region	COG2	COG2
chr16:724351-725052	2.29813	0.00250405
chr6:32513184-32516234	2.32583	0.00251796
chr10:12275526-12280589	2.30083	0.00252883	promoter region:CDC123|NM_006023(+)//NUDT5|NM_014142(-)	promoter region	CDC123	CDC123
chr6:31744266-31747316	2.32083	0.00253173	promoter region:LY6G5B|NM_021221(+)	promoter region	LY6G5B	LY6G5B
chr6:52279643-52280344	2.33286	0.00256238	left:MCM3|NM_002388(22102-)	left	MCM3
chr19:49120788-49123838	2.32333	0.00256504	promoter region:ZNF45|NM_003425(-)	promoter region	ZNF45	ZNF45
chr11:56848190-56851429	2.32333	0.00257115	promoter region:TNKS1BP1|NM_033396(-)	promoter region	TNKS1BP1	TNKS1BP1
chr15:86963090-86966140	2.33667	0.00259363	promoter region:AEN|NM_022767(+)	promoter region	AEN	AEN
chrX:54086722-54089772	2.346	0.002689
chr16:2517735-2518436	-2.27875	0.00269567	within:AMDHD2|NM_015944(+)//AMDHD2|NM_001145815(+)	within	AMDHD2
chr8:140700046-140700746	2.35	0.00270736	within:KCNK9|NM_016601(-)	within	KCNK9
chr11:73855638-73858688	-2.24994	0.0027875	promoter region:KCNE3|NM_005472(-)	promoter region	KCNE3	KCNE3
chr2:100399913-100402963	2.35167	0.00279801	promoter region:CHST10|NM_004854(-)	promoter region	CHST10	CHST10
chr6:86407278-86412202	2.33525	0.00280722	promoter region:SYNCRIP|NM_001159676(-)//SYNCRIP|NM_001159673(-)//SYNCRIP|NM_006372(-)//SYNCRIP|NM_001159677(-)//SYNCRIP|NM_001159675(-)//SYNCRIP|NM_001159674(-)	promoter region	SYNCRIP	SYNCRIP
chrX:153647556-153650606	2.36375	0.0028191	promoter region:SNORA36A|NR_002969(+)	promoter region	SNORA36A	SNORA36A
chr17:59427006-59430056	2.33714	0.00283674	promoter region:C17orf72|NR_015354(+)	promoter region	C17orf72	C17orf72
chr2:190354615-190359782	2.369	0.0028678	promoter region:ORMDL1|NM_001128150(-)//PMS1|NM_000534(+)//PMS1|NM_001128143(+)//ORMDL1|NM_016467(-)//PMS1|NM_001128144(+)	promoter region	ORMDL1	ORMDL1
chr3:133853539-133856589	2.36875	0.00286943	promoter region:UBA5|NM_198329(+)	promoter region	UBA5	UBA5
chr14:95789871-95792921	2.3755	0.00292	promoter region:BDKRB1|NM_000710(+)	promoter region	BDKRB1	BDKRB1
chr10:82155781-82158897	-0.547188	0.00293467	promoter region:C10orf58|NM_032333(+)	promoter region	C10orf58	C10orf58
chr7:157383075-157383776	2.36429	0.00295195	within:PTPRN2|NM_130842(-)//PTPRN2|NM_130843(-)//PTPRN2|NM_002847(-)	within	PTPRN2
chr11:6596658-6599708	2.35475	0.00295628	promoter region:TPP1|NM_000391(-)	promoter region	TPP1	TPP1
chr18:42005545-42009102	2.3695	0.00295772	promoter region:C18orf25|NM_145055(+)//C18orf25|NM_001008239(+)	promoter region	C18orf25	C18orf25
chr5:157218136-157221186	2.37786	0.00296664	promoter region:CLINT1|NM_014666(-)	promoter region	CLINT1	CLINT1
chr19:57624038-57627088	2.37867	0.00297368	promoter region:ZNF534|NM_001143938(+)//ZNF534|NM_001143939(+)	promoter region	ZNF534	ZNF534
chr16:167894-171761	2.34095	0.00297525	promoter region:HBQ1|NM_005331(+)	promoter region	HBQ1	HBQ1
chr14:99188435-99189136	2.33143	0.00299178	within:HHIPL1|NM_032425(+)//HHIPL1|NM_001127258(+)	within	HHIPL1
chr6:31888829-31893254	2.38367	0.00299935	promoter region:HSPA1A|NM_005345(+)//HSPA1L|NM_005527(-)	promoter region	HSPA1A	HSPA1A
chr9:6635080-6638132	2.369	0.00300367	promoter region:GLDC|NM_000170(-)	promoter region	GLDC	GLDC
chr5:148738421-148741471	2.34333	0.00300477	promoter region:IL17B|NM_014443(-)	promoter region	IL17B	IL17B
chr15:27193024-27193725	-2.0096	0.00301308	within:APBA2|NM_001130414(+)//APBA2|NM_005503(+)	within	APBA2
chr22:16017838-16022609	2.38571	0.00301464	promoter region:CECR4|NR_024483(+)//CECR5|NM_033070(-)//CECR4|NR_024482(+)	promoter region	CECR4	CECR4
chrY:13522972-13526702	2.38679	0.00302073	promoter region:DDX3Y|NM_004660(+)//DDX3Y|NM_001122665(+)	promoter region	DDX3Y	DDX3Y
chr13:99983388-99986438	2.38857	0.00303378	promoter region:A2LD1|NM_033110(-)	promoter region	A2LD1	A2LD1
chr12:51977296-51980352	2.38333	0.00305085	promoter region:C12orf10|NM_021640(+)	promoter region	C12orf10	C12orf10
chr12:1525559-1526259	2.37464	0.00305424	left:ERC1|NM_015064//ERC1|NM_178040//ERC1|NM_178037//ERC1|NM_178038//ERC1|NM_178039(554895+)	left	ERC1
chr7:72322984-72326034	2.391	0.00305511	promoter region:GTF2IRD2P1|NR_002164(-)	promoter region	GTF2IRD2P1	GTF2IRD2P1
chr11:64112417-64115467	2.398	0.00311724	promoter region:SLC22A12|NM_144585(+)//SLC22A12|NM_153378(+)	promoter region	SLC22A12	SLC22A12
chr4:129103470-129109029	2.39681	0.00312484	promoter region:C4orf29|NM_001039717(+)//MFSD8|NM_152778(-)	promoter region	C4orf29	C4orf29
chr19:44305819-44308869	2.375	0.00314322	promoter region:PAK4|NM_001014835(+)//PAK4|NM_005884(+)//PAK4|NM_001014834(+)//PAK4|NM_001014832(+)//PAK4|NM_001014831(+)	promoter region	PAK4	PAK4
chr19:1830684-1831384	2.39875	0.00316963
chr17:629822-634761	2.39667	0.00319764	promoter region:GLOD4|NM_016080(-)//RNMTL1|NM_018146(+)	promoter region	GLOD4	GLOD4
chr6:156993643-156994343	2.39095	0.00321738	left:NOX3|NM_015718(1174914-)	left	NOX3
chrX:70230310-70233585	2.3925	0.00323077	promoter region:FOXO4|NM_005938(+)	promoter region	FOXO4	FOXO4
chr7:75867350-75868051	-2.25525	0.00323454	within:SRCRB4D|NM_080744(-)//ZP3|NM_007155(+)	within	SRCRB4D
chrX:151675949-151679076	2.41	0.00324708
chr6:131187576-131190626	2.41333	0.00325211
chr7:5075823-5078873	-2.24958	0.00326907	promoter region:LOC389458|NR_015343(+)	promoter region	LOC389458	LOC389458
chr2:97714860-97717910	2.41705	0.00329517	promoter region:ZAP70|NM_207519(+)	promoter region	ZAP70	ZAP70
chrY:18200116-18203187	2.40792	0.00330342	promoter region:NCRNA00230B|NR_002160(-)//NCRNA00230A|NR_002161(-)	promoter region	NCRNA00230B	NCRNA00230B
chr4:142359058-142362108	2.3875	0.00330739	promoter region:ZNF330|NM_014487(+)	promoter region	ZNF330	ZNF330
chr16:3706978-3710039	2.4225	0.00333361	promoter region:TRAP1|NM_016292(-)	promoter region	TRAP1	TRAP1
chr7:107953264-107956314	2.41042	0.00341652	promoter region:PNPLA8|NM_015723(-)	promoter region	PNPLA8	PNPLA8
chr14:34581423-34585970	2.432	0.00342376	promoter region:FAM177A1|NM_001079519(+)//FAM177A1|NM_173607(+)	promoter region	FAM177A1	FAM177A1
chr9:114912556-114916218	2.432	0.0034268	promoter region:NCRNA00256A|NR_024366(+)//NCRNA00256B|NR_024376(-)	promoter region	NCRNA00256A	NCRNA00256A
chr20:50202158-50202859	-0.5575	0.00342862	within:ZFP64|NM_018197(-)//ZFP64|NM_199426(-)//ZFP64|NM_022088(-)//ZFP64|NM_199427(-)	within	ZFP64
chr14:44791745-44794795	2.435	0.00345222	promoter region:C14orf106|NM_018353(-)	promoter region	C14orf106	C14orf106
chr10:70515393-70518443	2.43702	0.00347249	promoter region:SRGN|NM_002727(+)	promoter region	SRGN	SRGN
chr7:75512888-75517697	2.42767	0.00349352	promoter region:STYXL1|NM_016086(-)//MDH2|NM_005918(+)	promoter region	STYXL1	STYXL1
chr18:75254280-75261923	2.43938	0.00354958	promoter region:NFATC1|NM_172387(+)//NFATC1|NM_172390(+)//NFATC1|NM_172388(+)//NFATC1|NM_172389(+)//NFATC1|NM_006162(+)	promoter region	NFATC1	NFATC1
chr11:55867650-55870700	2.44821	0.00359423	promoter region:OR8K1|NM_001002907(+)	promoter region	OR8K1	OR8K1
chr7:143399805-143402855	2.4525	0.00360427	promoter region:OR2A25|NM_001004488(+)	promoter region	OR2A25	OR2A25
chr7:17302391-17305626	2.45625	0.00364095	promoter region:AHR|NM_001621(+)	promoter region	AHR	AHR
chr21:43172137-43175187	2.44413	0.00364757	promoter region:WDR4|NM_033661(-)//WDR4|NM_018669(-)	promoter region	WDR4	WDR4
chr10:74537775-74540825	2.453	0.00364934	promoter region:NUDT13|NM_015901(+)	promoter region	NUDT13	NUDT13
chr11:101291853-101294903	2.46	0.00367463	promoter region:ANGPTL5|NM_178127(-)	promoter region	ANGPTL5	ANGPTL5
chr15:73657857-73661120	2.46	0.00368371	promoter region:PTPN9|NM_002833(-)	promoter region	PTPN9	PTPN9
chr21:10011784-10015231	2.45958	0.00368668	promoter region:TPTE|NM_199261(-)//TPTE|NM_199260(-)//TPTE|NM_199259(-)	promoter region	TPTE	TPTE
chr19:60677070-60680120	2.45607	0.00370053	promoter region:ZNF628|NM_033113(+)	promoter region	ZNF628	ZNF628
chr4:69218359-69221409	2.3475	0.00370358	promoter region:UGT2B15|NM_001076(-)	promoter region	UGT2B15	UGT2B15
chrY:18967359-18968059	2.42667	0.00371825	left:NCRNA00230B|NR_002160(19532+)	left	NCRNA00230B
chr8:17822205-17825552	2.44542	0.00373601	promoter region:PCM1|NM_006197(+)	promoter region	PCM1	PCM1
chr13:108044060-108047110	-0.755613	0.00375305	promoter region:MYO16|NM_015011(+)	promoter region	MYO16	MYO16
chr5:1387828-1388529	2.42833	0.00375313	within:CLPTM1L|NM_030782(-)	within	CLPTM1L
chr7:75280359-75283409	-2.245	0.00375755	promoter region:CCL24|NM_002991(-)	promoter region	CCL24	CCL24
chr6:34338925-34339626	2.469	0.00375877	left:C6orf1|NM_001008703//C6orf1|NM_001008704//C6orf1|NM_178508(14043-)	left	C6orf1
chr18:2902833-2903533	2.45393	0.00379453	within:EMILIN2|NM_032048(+)	within	EMILIN2
chr15:91410097-91410797	2.47	0.00380684	within:RGMA|NM_020211(-)	within	RGMA
chrY:6355875-6358925	2.465	0.00383161	promoter region:TTTY2B|NR_003590(-)//TTTY2|NR_001536(-)	promoter region	TTTY2B	TTTY2B
chr11:59610272-59613322	2.48125	0.00389855	promoter region:MS4A2|NM_001142303(+)//MS4A2|NM_000139(+)	promoter region	MS4A2	MS4A2
chrY:6448167-6448868	2.48667	0.00401227	left:TTTY8B|NR_003591//TTTY8|NR_001533(46496-)	left	TTTY8B
chr1:115196537-115199587	2.485	0.00401458	promoter region:SYCP1|NM_003176(+)	promoter region	SYCP1	SYCP1
chr17:23684234-23689062	2.49458	0.0040353	promoter region:TNFAIP1|NM_021137(+)//IFT20|NM_174887(-)	promoter region	TNFAIP1	TNFAIP1
chr1:167946851-167949901	2.48393	0.00404284	promoter region:SELL|NM_000655(-)	promoter region	SELL	SELL
chr1:40397187-40400237	2.51333	0.00418772	promoter region:RLF|NM_012421(+)	promoter region	RLF	RLF
chr17:36778963-36782013	2.50583	0.00423846	promoter region:KRT33B|NM_002279(-)	promoter region	KRT33B	KRT33B
chr1:231564085-231564785	2.5185	0.00424705	within:KIAA1804|NM_032435(+)	within	KIAA1804
chr22:28327104-28330154	2.515	0.00426755	promoter region:NF2|NM_181828(+)//NF2|NM_181831(+)//NF2|NM_181825(+)//NF2|NM_181829(+)//NF2|NM_016418(+)//NF2|NM_000268(+)//NF2|NM_181833(+)//NF2|NM_181832(+)//NF2|NM_181830(+)	promoter region	NF2	NF2
chr6:117096040-117099090	2.51917	0.00430711	promoter region:ZUFSP|NM_145062(-)	promoter region	ZUFSP	ZUFSP
chr7:73707525-73710971	2.51875	0.0043093
chr7:99364569-99367619	-2.20708	0.00431406	promoter region:GJC3|NM_181538(-)	promoter region	GJC3	GJC3
chr10:105351626-105352326	2.47467	0.00432518	within:SH3PXD2A|NM_014631(-)	within	SH3PXD2A
chr16:56036462-56041310	2.5275	0.00433411	promoter region:COQ9|NM_020312(+)//CIAPIN1|NM_020313(-)	promoter region	COQ9	COQ9
chr19:53080856-53083906	2.52	0.00433966	promoter region:SULT2A1|NM_003167(-)	promoter region	SULT2A1	SULT2A1
chr21:38412974-38417764	2.535	0.00437534	promoter region:DSCR8|NR_026840(+)//DSCR4|NM_005867(-)//DSCR8|NR_026839(+)//DSCR8|NR_026841(+)//DSCR8|NR_026838(+)//DSCR8|NR_026842(+)	promoter region	DSCR8	DSCR8
chr6:16434929-16435760	2.53032	0.00438327	within:ATXN1|NM_001128164(-)//ATXN1|NM_000332(-)	within	ATXN1
chr19:49406090-49409140	2.524	0.00439119	promoter region:ZNF227|NM_182490(+)	promoter region	ZNF227	ZNF227
chr1:111790825-111795793	2.542	0.00443558	promoter region:ATP5F1|NM_001688(+)//WDR77|NM_024102(-)	promoter region	ATP5F1	ATP5F1
chr5:176379862-176382912	2.54	0.00443685	promoter region:ZNF346|NM_012279(+)	promoter region	ZNF346	ZNF346
chr19:55243308-55246414	2.53417	0.00445551	promoter region:FLJ26850|NR_027257(+)	promoter region	FLJ26850	FLJ26850
chr9:34617401-34620451	2.545	0.00445685	promoter region:ARID3C|NM_001017363(-)	promoter region	ARID3C	ARID3C
chr13:94045902-94048952	2.545	0.00448174	promoter region:TGDS|NM_014305(-)	promoter region	TGDS	TGDS
chr19:54147488-54150538	2.53833	0.00449274	promoter region:BAX|NM_138765(+)//BAX|NM_138763(+)//BAX|NM_004324(+)//BAX|NM_138761(+)//BAX|NM_138764(+)	promoter region	BAX	BAX
chr6:168462530-168465691	2.53917	0.00450938	promoter region:DACT2|NM_214462(-)	promoter region	DACT2	DACT2
chr19:62728064-62731114	2.51667	0.00454467	promoter region:ZNF549|NM_153263(+)	promoter region	ZNF549	ZNF549
chr12:69600241-69603291	2.55667	0.00455005	promoter region:PTPRR|NM_002849(-)	promoter region	PTPRR	PTPRR
chr3:42919965-42923271	2.557	0.00456122	promoter region:ZNF662|NM_001134656(+)//ZNF662|NM_207404(+)	promoter region	ZNF662	ZNF662
chr19:1328705-1329405	2.47042	0.00459917	within:MUM1|NM_032853(+)//MUM1|NR_024247(+)	within	MUM1
chrX:100434091-100437141	2.515	0.00462072	promoter region:TAF7L|NM_024885(-)	promoter region	TAF7L	TAF7L
chrY:10355426-10359016	2.55687	0.00463403	promoter region:TTTY23|NR_001540(+)//TTTY23B|NR_003593(+)	promoter region	TTTY23	TTTY23
chr19:59665987-59669146	2.5625	0.00464096	promoter region:LENG9|NM_198988(-)	promoter region	LENG9	LENG9
chr13:110468307-110469008	2.572	0.00468441	left:ANKRD10|NM_017664(102890-)	left	ANKRD10
chr9:94125121-94130137	2.54517	0.00470608	promoter region:NOL8|NR_024020(-)//NOL8|NM_017948(-)//CENPP|NM_001012267(+)	promoter region	NOL8	NOL8
chr1:31180600-31183650	2.5735	0.00471498	promoter region:SNORD103A|NR_004054(-)	promoter region	SNORD103A	SNORD103A
chr9:138879949-138882999	2.57119	0.00475181	promoter region:EDF1|NM_003792(-)//EDF1|NM_153200(-)	promoter region	EDF1	EDF1
chr11:1286805-1289855	2.57708	0.0047656	promoter region:TOLLIP|NM_019009(-)	promoter region	TOLLIP	TOLLIP
chr4:7825182-7825882	2.57729	0.00476629	within:AFAP1|NM_001134647(-)//AFAP1|NM_198595(-)//AFAP1AS|NR_026892(+)	within	AFAP1
chr6:29635071-29638121	2.586	0.00481301	promoter region:UBD|NM_006398(-)	promoter region	UBD	UBD
chr6:29241347-29242048	-2.0701	0.00481717	left:OR2J3|NM_001005216(53701+)	left	OR2J3
chrY:6171041-6174873	2.595	0.00489011	promoter region:TTTY23|NR_001540(-)//TTTY23B|NR_003593(-)//TSPY2|NM_022573(+)	promoter region	TTTY23	TTTY23
chr18:645163-650780	2.56125	0.0049008
chr3:10179122-10182172	2.59125	0.00490473	promoter region:IRAK2|NM_001570(+)	promoter region	IRAK2	IRAK2
chr12:52187079-52190129	2.58375	0.00490554	promoter region:NPFF|NM_003717(-)	promoter region	NPFF	NPFF
chrY:22861953-22865007	2.59856	0.00491864	promoter region:RBMY1F|NM_152585(+)//RBMY2FP|NR_002193(+)	promoter region	RBMY1F	RBMY1F
chr1:181825752-181829109	2.60017	0.00493932	promoter region:NCF2|NM_001127651(-)//NCF2|NM_000433(-)	promoter region	NCF2	NCF2
chr1:245815844-245818894	2.57833	0.00494688	promoter region:OR2G2|NM_001001915(+)	promoter region	OR2G2	OR2G2
chr18:17573102-17576152	2.58	0.00504334	promoter region:MIB1|NM_020774(+)	promoter region	MIB1	MIB1
chr8:67842184-67845234	2.58917	0.00505375	promoter region:PTTG3P|NR_002734(-)	promoter region	PTTG3P	PTTG3P
chr19:7018030-7021080	2.60583	0.00508324	promoter region:ZNF557|NM_001044387(+)//ZNF557|NM_024341(+)//ZNF557|NM_001044388(+)	promoter region	ZNF557	ZNF557
chrY:9219873-9222923	2.62033	0.00510348	promoter region:RBMY1A3P|NR_001547(-)	promoter region	RBMY1A3P	RBMY1A3P
chr6:168937651-168938352	2.6225	0.00513034	left:SMOC2|NM_022138(352772+)	left	SMOC2
chr19:61430861-61433911	2.63083	0.00518625	promoter region:ZSCAN5A|NM_024303(-)	promoter region	ZSCAN5A	ZSCAN5A
chr2:46375626-46380644	2.6391	0.0052722	promoter region:EPAS1|NM_001430(+)	promoter region	EPAS1	EPAS1
chr7:100045220-100048659	2.64333	0.0052895	promoter region:MOSPD3|NM_001040099(+)//MOSPD3|NM_023948(+)//MOSPD3|NM_001040098(+)//MOSPD3|NM_001040097(+)	promoter region	MOSPD3	MOSPD3
chr6:29469954-29473004	2.59783	0.00531948	promoter region:OR12D2|NM_013936(+)	promoter region	OR12D2	OR12D2
chr6:122970635-122973685	2.64833	0.00533569	promoter region:PKIB|NM_032471(+)//PKIB|NM_181795(+)	promoter region	PKIB	PKIB
chr14:23668074-23671789	2.64917	0.00534175
chrX:105821283-105824333	2.58967	0.00537578	promoter region:RNF128|NM_024539(+)	promoter region	RNF128	RNF128
chrY:19008467-19009168	2.655	0.00537802
chrY:14322400-14325450	2.66071	0.00542565	promoter region:TMSB4Y|NM_004202(+)	promoter region	TMSB4Y	TMSB4Y
chr1:210523061-210526317	2.6575	0.00549732	promoter region:PPP2R5A|NM_006243(+)	promoter region	PPP2R5A	PPP2R5A
chr9:70976468-70979518	2.67133	0.00551046	promoter region:TJP2|NM_201629(+)//TJP2|NM_004817(+)	promoter region	TJP2	TJP2
chr7:30288007-30292166	2.68125	0.00558182	promoter region:ZNRF2|NM_147128(+)	promoter region	ZNRF2	ZNRF2
chr9:96526374-96529424	2.66028	0.00558296	promoter region:C9orf3|NM_032823(+)	promoter region	C9orf3	C9orf3
chr1:6584363-6587956	2.68375	0.00561442	promoter region:KLHL21|NM_014851(-)	promoter region	KLHL21	KLHL21
chr21:44254193-44257406	2.68925	0.00564849	promoter region:TRAPPC10|NM_003274(+)	promoter region	TRAPPC10	TRAPPC10
chr11:68570485-68573572	2.57333	0.00565956	promoter region:TPCN2|NM_139075(+)	promoter region	TPCN2	TPCN2
chr19:62014099-62017149	2.64125	0.00566906	promoter region:PEG3AS|NR_023847(+)	promoter region	PEG3AS	PEG3AS
chr11:124310908-124313958	2.68	0.00567378
chrY:18188873-18189573	2.695	0.00576732	left:NLGN4Y|NM_014893(3043026+)	left	NLGN4Y
chr12:78607662-78611361	2.69	0.00576926	promoter region:PAWR|NM_002583(-)	promoter region	PAWR	PAWR
chr22:29290266-29293316	2.71417	0.00581391	promoter region:GAL3ST1|NM_004861(-)	promoter region	GAL3ST1	GAL3ST1
chr19:58523936-58524637	2.7	0.00584081	left:BIRC8|NM_033341(37249-)	left	BIRC8
chr7:100153918-100156968	2.7075	0.00584667	promoter region:EPO|NM_000799(+)	promoter region	EPO	EPO
chr1:27688646-27691696	2.6825	0.00586625	promoter region:WASF2|NM_006990(-)	promoter region	WASF2	WASF2
chr5:78316073-78320553	2.72	0.00588547	promoter region:ARSB|NM_198709(-)//ARSB|NM_000046(-)	promoter region	ARSB	ARSB
chr13:43257858-43261546	2.64071	0.00588797	promoter region:ENOX1|NM_017993(-)	promoter region	ENOX1	ENOX1
chr2:25954017-25957256	2.56667	0.00589354	promoter region:ASXL2|NM_018263(-)	promoter region	ASXL2	ASXL2
chr19:3819417-3822467	2.727	0.00589881	promoter region:ZFR2|NR_027149(-)//ZFR2|NM_015174(-)//ZFR2|NM_001145640(-)	promoter region	ZFR2	ZFR2
chr1:13896881-13899931	2.68792	0.00596826
chr2:132888176-132891226	2.73625	0.00597596	promoter region:GPR39|NM_001508(+)	promoter region	GPR39	GPR39
chr2:121758536-121761688	2.69917	0.00599204	promoter region:TFCP2L1|NM_014553(-)	promoter region	TFCP2L1	TFCP2L1
chr7:139122209-139126505	2.67679	0.00605256	promoter region:TBXAS1|NM_001130966(+)//HIPK2|NM_022740(-)//HIPK2|NM_001113239(-)	promoter region	TBXAS1	TBXAS1
chr6:138522476-138525526	2.75167	0.00606437	promoter region:KIAA1244|NM_020340(+)	promoter region	KIAA1244	KIAA1244
chr7:16532638-16533338	2.7575	0.00612908	left:SOSTDC1|NM_015464(60639-)	left	SOSTDC1
chr4:41676029-41679160	2.6555	0.00617281	promoter region:DCAF4L1|NM_001029955(+)	promoter region	DCAF4L1	DCAF4L1
chr7:112217104-112220154	2.64833	0.00618608	promoter region:TMEM168|NM_022484(-)	promoter region	TMEM168	TMEM168
chr17:12631113-12634415	2.775	0.00619524	promoter region:RICH2|NM_014859(+)	promoter region	RICH2	RICH2
chr10:75240934-75244035	-2.27891	0.00620997	promoter region:NDST2|NM_003635(-)	promoter region	NDST2	NDST2
chrY:18180499-18181200	2.74617	0.00627958	left:NLGN4Y|NM_014893(3034652+)	left	NLGN4Y
chr4:15836623-15839699	2.78167	0.0062932	promoter region:TAPT1|NM_153365(-)	promoter region	TAPT1	TAPT1
chr12:7752915-7755965	2.727	0.00633204	promoter region:DPPA3|NM_199286(+)	promoter region	DPPA3	DPPA3
chr9:79955456-79956157	3.1525	0.00639249	left:GNAQ|NM_002072(119444-)	left	GNAQ
chr6:109554759-109557809	2.801	0.00640446	promoter region:C6orf182|NM_173830(+)	promoter region	C6orf182	C6orf182
chr6:137282654-137287135	-2.3324	0.00640519	promoter region:SLC35D3|NM_001008783(+)	promoter region	SLC35D3	SLC35D3
chr12:15005219-15008269	2.79167	0.00644564
chr4:89730229-89733504	2.80583	0.00649157	promoter region:HERC3|NM_014606(+)	promoter region	HERC3	HERC3
chr2:32139743-32142970	2.84167	0.00650983	promoter region:SPAST|NM_199436(+)//SPAST|NM_014946(+)	promoter region	SPAST	SPAST
chr3:126135660-126138710	2.85625	0.00655771	promoter region:MUC13|NM_033049(-)	promoter region	MUC13	MUC13
chr8:1126161-1126861	2.84179	0.00656109	left:ERICH1|NM_207332(454935-)	left	ERICH1
chr1:96957322-96960372	2.82	0.00658314	promoter region:PTBP2|NM_021190(+)	promoter region	PTBP2	PTBP2
chr5:140048761-140053595	2.76333	0.00658985	promoter region:HARS2|NM_012208(+)//HARS|NM_002109(-)	promoter region	HARS2	HARS2
chr2:108699928-108703102	2.86917	0.00661817	promoter region:RANBP2|NM_006267(+)	promoter region	RANBP2	RANBP2
chr19:61323583-61326901	2.8225	0.00669071	promoter region:ZNF787|NM_001002836(-)	promoter region	ZNF787	ZNF787
chr2:62784064-62788145	2.99	0.00677374	promoter region:EHBP1|NM_015252(+)//EHBP1|NM_001142614(+)//EHBP1|NM_001142616(+)	promoter region	EHBP1	EHBP1
chr1:119991303-119994353	3.02	0.0067936	promoter region:ZNF697|NM_001080470(-)	promoter region	ZNF697	ZNF697
chr12:25596835-25599924	2.944	0.00679379	promoter region:IFLTD1|NM_001145729(-)//IFLTD1|NR_027296(-)//IFLTD1|NM_001145728(-)//IFLTD1|NM_152590(-)	promoter region	IFLTD1	IFLTD1
chr6:41994502-41999295	2.9475	0.0068756	promoter region:MED20|NM_004275(-)//BYSL|NM_004053(+)	promoter region	MED20	MED20
chr11:76861841-76865196	2.89325	0.00688216	promoter region:PAK1|NM_002576(-)//PAK1|NM_001128620(-)	promoter region	PAK1	PAK1
chr11:76975887-76979039	2.985	0.00688255	promoter region:AQP11|NM_173039(+)	promoter region	AQP11	AQP11
chr8:104450521-104453571	2.99083	0.0068895	promoter region:CTHRC1|NM_138455(+)	promoter region	CTHRC1	CTHRC1
chr9:101021950-101026507	2.77	0.00692647	promoter region:SEC61B|NM_006808(+)//ALG2|NR_024532(-)//ALG2|NM_033087(-)	promoter region	SEC61B	SEC61B
chr15:70453067-70458014	3.0325	0.00700017	promoter region:C15orf34|NR_027262(+)//HEXA|NM_000520(-)	promoter region	C15orf34	C15orf34
chr11:95160849-95165042	2.9275	0.00718883	promoter region:CEP57|NM_014679(+)//FAM76B|NM_144664(-)	promoter region	CEP57	CEP57
chr14:22573584-22576709	2.91375	0.00725364	promoter region:PSMB5|NM_002797(-)//PSMB5|NM_001144932(-)//PSMB5|NM_001130725(-)	promoter region	PSMB5	PSMB5
chr17:40466804-40467505	2.91071	0.00741566	within:DCAKD|NM_001128631(-)//DCAKD|NM_024819(-)	within	DCAKD
chr20:60149776-60154309	2.955	0.00771862	promoter region:SS18L1|NM_198935(+)//PSMA7|NM_002792(-)	promoter region	SS18L1	SS18L1
chr18:13488761-13489720	-0.566583	0.00986114	within:C18orf1|NM_181481(+)//C18orf1|NM_181482(+)	within	C18orf1
